1

## 2 **Zoonotic avian influenza viruses evade human BTN3A3 restriction**

3

4

5 Rute Maria Pinto<sup>1</sup>, Siddharth Bakshi<sup>1+</sup>, Spyros Lytras<sup>1+</sup>, Mohammad Khalid Zakaria<sup>1+</sup>,  
6 Simon Swingle<sup>1</sup>, Julie C Worrell<sup>2</sup>, Vanessa Herder<sup>1</sup>, Margus Varjak<sup>1b</sup>, Natalia  
7 Cameron-Ruiz<sup>1</sup>, Mila Collados Rodriguez<sup>1</sup>, Mariana Varela<sup>1</sup>, Arthur Wickenhagen<sup>1</sup>,  
8 Colin Loney<sup>1</sup>, Yanlong Pei<sup>3</sup>, Joseph Hughes<sup>1</sup>, Elise Valette<sup>1</sup>, Matthew L Turnbull<sup>1</sup>,  
9 Wilhelm Furnon<sup>1</sup>, Kerrie E Hargrave<sup>2</sup>, Quan Gu<sup>1</sup>, Lauren Orr<sup>1</sup>, Aislynn Taggart<sup>1</sup>,  
10 Chris Boutell<sup>1</sup>, Finn Grey<sup>5</sup>, Edward Hutchinson<sup>1</sup>, Paul Digard<sup>5</sup>, Isabella Monne<sup>4</sup>,  
11 Sarah K Wootton<sup>3</sup>, Megan K L MacLeod<sup>2</sup>, Sam J Wilson<sup>1++</sup>, Massimo Palmarini<sup>1++\*</sup>

12

13 <sup>1</sup>MRC–University of Glasgow Centre for Virus Research (CVR), Glasgow, UK.

14 <sup>2</sup>Institute of Infection, Immunity and Inflammation, University of Glasgow, UK.

15 <sup>3</sup>Department of Pathobiology, University of Guelph, Guelph, Ontario, Canada.

16 <sup>4</sup>Istituto Zooprofilattico Sperimentale delle Venezie (IZSve), Legnaro, Italy.

17 <sup>5</sup>Roslin Institute, University of Edinburgh, Edinburgh, UK.

18 <sup>+</sup>contributed equally to this work

19 <sup>++</sup>contributed equally to this work

20 <sup>\*</sup>Corresponding author

21

22 <sup>1a</sup>Present address: Faculty of Science and Technology, Institute of Technology,  
23 University of Tartu, Estonia.

## Abstract

Cross-species transmission of avian influenza A viruses (IAVs) into humans could represent the first step of a future pandemic<sup>1</sup>. Multiple factors limiting the spillover and adaptation of avian IAVs in humans have been identified, but they are not sufficient to explain which virus lineages are more likely to cross the species barrier<sup>1,2</sup>. Here, we identified human BTN3A3<sup>3</sup> (butyrophilin subfamily 3 member A3) as a potent inhibitor of avian but not human IAVs. We determined that BTN3A3 is constitutively expressed in human airways and its antiviral activity evolved in primates. We show that BTN3A3 restriction acts at the early stages of virus replication by inhibiting avian IAV vRNA transcription. We identified residue 313 in the viral nucleoprotein (NP) as the genetic determinant of BTN3A3 sensitivity (313F, or rarely 313L in avian viruses) or evasion (313Y or 313V in human viruses). However, several serotypes of avian IAVs that spilled over into humans in recent decades evade BTN3A3 restriction. In these cases, BTN3A3 evasion is due to substitutions (N, H or Q) in NP residue 52 that is adjacent to residue 313 in the NP structure<sup>4</sup>. Importantly, we identified more than 150 avian IAV lineages with a BTN3A3-resistant genotype. In conclusion, sensitivity or resistance to BTN3A3 is another factor to consider in the risk assessment of the zoonotic potential of avian influenza viruses.

## Main Text

Influenza A viruses (IAVs) cause a substantial global health burden and circulate both in humans and animal species including domestic poultry, pigs, dogs and horses. Wild aquatic birds are the main natural reservoir of IAV<sup>5</sup>. Ducks, shorebirds, gulls and other waterbirds harbour 16 haemagglutinin (HA) and 9 neuraminidase (NA) subtypes<sup>6</sup>. IAV from wild bird reservoirs can infect terrestrial birds such as chickens, turkeys, quail and other gallinaceous species, or domestic waterfowl<sup>5</sup>. The population density of domestic birds allows opportunities for IAVs to spill over into susceptible mammals, including humans. Avian IAVs can also further reassort (i.e. exchange genome segments) with viruses established in susceptible species resulting in a rich genetic diversity for this group of viruses. In humans, the influenza

1 pandemics of 1918, 1957, 1968 and 2009 were all caused by viruses containing at  
2 least some genomic segments of avian origin<sup>7,8</sup>.

3 Occasionally, transmission of avian IAVs into humans occurs and may result in  
4 severe or even lethal disease<sup>9</sup>. For example, in 2013 an H7N9 variant, resulting from  
5 multiple reassortment events of different avian viruses<sup>10</sup>, caused more than 600  
6 deaths in humans<sup>11</sup>. These spillover events are not typically followed by extensive  
7 human-to-human transmission chains, but they are a risk to global health as they  
8 could enable the first step towards adaptation to the human host and the generation  
9 of pandemic IAV strains<sup>1</sup>.

10 Multiple barriers have been identified that hamper avian IAVs transmission and  
11 adaptation in humans<sup>12</sup>. These include virus haemagglutinin (HA) receptor binding  
12 specificity<sup>13</sup>, the pH that activates HA<sup>14,15</sup>, the efficiency of the virus polymerase<sup>16</sup>,  
13 the length of the viral neuraminidase (NA) stalk<sup>17,18</sup>, and sensitivity to the host  
14 antiviral factor Mx1/MxA<sup>19,20</sup>. For example, the unusually high number of human  
15 infections caused by H7N9, has been correlated with changes in the viral  
16 glycoproteins, and the polymerase complex<sup>21</sup>. Correlation between disease severity  
17 induced by H7N9 and certain human Mx1 alleles has also been described in GWAS  
18 studies<sup>22</sup>.

19 Despite the progress made in the last two decades, there is an incomplete  
20 understanding of what allows certain avian IAV subtypes/lineages to spill over in  
21 humans. In this study, we aimed to identify (i) host genetic barriers to avian IAVs  
22 replication in human cells and (ii) IAV genetic signatures that can be directly  
23 correlated with their zoonotic potential.

24 **Human BTN3A3 potently and specifically restrict avian IAVs.** We focused on the  
25 host type-I interferon (IFN) response as it is one of the key host antiviral innate  
26 immune mechanisms and a barrier for virus cross-species transmission<sup>23</sup>. IFN acts  
27 through the activation of hundreds of interferon stimulated genes (ISGs), some of  
28 which have antiviral properties<sup>23</sup>. Hence, we first aimed to identify human ISGs that  
29 contribute to IAVs host tropism. We performed arrayed expression screening<sup>24,25</sup> of  
30 752 human and macaque ISGs (Fig. 1a) using three different recombinant IAV  
31 strains, each tagged with GFP: A/Puerto Rico/8/1934 (PR8, a human laboratory  
32 adapted H1N1 strain), A/California/04/2009 (Cal04, a mouse-adapted pdm09 H1N1

strain) and A/mallard/Netherlands/10-Cam/1999 (Mallard, a H1N1 avian strain). These screens (Fig. 1b, Extended Data Fig. 1) identified ISGs previously shown to be antiviral against human-origin IAVs, such as IFITM2, IFITM3 and Mx1<sup>26-29</sup>. However, two other ISGs, BTN3A1 and BTN3A3, inhibited the avian virus (Mallard), but not the mammalian viruses (PR8 or Cal04).

In order to validate these data, we carried out loss of function experiments. We detected constitutive expression of BTN3A3 in primary immortalised human foetal lung fibroblasts (MRC5T) and human bronchial epithelial cells (hBEC3-KT) (Fig. 1c). siRNA-mediated knockdown of BTN3A3 in these cells resulted in improved replication of the avian Mallard strain, while it did not affect the growth kinetics of PR8 (Fig. 1d). Equivalent knockdown experiments targeting BTN3A1 did not show a significant difference in avian IAVs replication (Extended Data Fig. 2).

By immunohistochemistry we showed that BTN3A3 is constitutively expressed in the respiratory tract of healthy/uninfected individuals, both in upper and lower respiratory tract. We saw BTN3A3 expression in ciliated cells within the nasal epithelium and bronchioli, type I and II alveolar epithelial cells and alveolar macrophages (Fig. 1e). Indeed, available data from human transcriptomic profiles (GTEx consortium) suggest that the lungs have the second highest expression levels of BTN3A3 across 30 tissues analysed (Extended Data Fig. 3).

The butyrophilin gene superfamily has undergone complex duplication events over its evolutionary history with subfamily 3 comprising of three primate-specific paralogues: BTN3A1-3<sup>3,30</sup>. We tested the antiviral activity of overexpressed human BTN3A1, BTN3A2 and BTN3A3 in A549 cells (Fig. 2a). Infection of BTN3-overexpressing cells using GFP-tagged and untagged viruses showed that PR8 was not sensitive to any of the human BTN3 proteins. However, BTN3A1 and BTN3A3 were successful at restricting Mallard (the latter being more effective at restriction) whilst BTN3A2 showed no antiviral effects (Fig. 2b-c). Next, we assessed the antiviral effects of the BTN3 proteins against a wider panel of IAV strains. These included human laboratory-adapted viruses, human clinical isolates and various avian influenza viruses isolated from divergent bird species. None of the human viruses tested were sensitive to any of the BTN3A proteins (Fig. 2d, left panels). However, the replication of all avian viruses was restricted approximately 10-fold by

1 BTN3A1. Restriction of avian viruses by BTN3A3 was even greater with viral titres  
2 barely reaching the limit of detection and showing a decrease of up to 100,000-fold  
3 (Fig. 2d, right panels).

4 We further tested the antiviral specificity of BTN3A1 and BTN3A3 against an  
5 additional 24 viruses from a selection of genera, including both dsDNA, ssRNA and  
6 dsRNA viruses, including both enveloped and non-enveloped viruses. Of all the  
7 screened viruses, Mallard was the only virus substantially inhibited by BTN3A1 and  
8 BTN3A3 (Fig. 2e). Further validation assays against a panel of human respiratory  
9 viruses confirmed the specificity of this restriction factor against avian IAVs (Fig. 2f).

10 **BTN3A3 antiviral activity likely evolved after the split between old and new**  
11 **world monkeys.** We then examined the origin of anti-avian IAV activity in the BTN3  
12 gene family. Phylogenetic analysis of the BTN3A genes of the *Haplorrhini* sub-order  
13 (tarsier, monkey, apes, and humans) indicated that BTN3A1-3 originated through  
14 two successive duplications after the split between the new world monkeys lineage  
15 (*Platyrrhini*) and the old world monkeys and apes lineage (*Catarrhini*) around 40 – 44  
16 million years ago (Fig. 3a)<sup>31</sup>. Domain detection analysis showed that the majority of  
17 BTN3A1 and BTN3A3 genes have a consistent domain organisation with one set of  
18 N-terminal IgV and IgC domains followed by a PRYSPRY domain, while BTN3A2  
19 genes have lost their PRYSPRY domain (with the exception of *Nomascus*  
20 *leucogenys* BTN3A2).

21 Transient transduction of A549 cells with BTN3A-expressing lentiviruses followed by  
22 viral challenge showed, that PR8 was not restricted by any *Haplorrhini* BTN3  
23 proteins (Fig. 3b). Mallard was inhibited specifically by the *Catarrhini* (old world  
24 monkeys and apes) BTN3A1/3 genes but not by *Platyrrhini* (new world monkeys) or  
25 *Tarsiiformes* (tarsier) BTN3 genes (Fig. 3b). This suggests that the antiviral  
26 phenotype of BTN3A3 was gained after the *Platyrrhini-Catarrhini* split, consistent  
27 with the two duplication events. Humans, chimpanzees (*Pan troglodytes*), gorillas  
28 (*Gorilla gorilla*), orangutans (*Pongo abelii*), macaques (*Macaca mulatta*) and green  
29 monkeys (*Chlorocebus sabaeus*) all have at least one BTN3A1/3 gene capable of  
30 inhibiting Mallard viral replication (Fig. 3b). We also found that the closest  
31 orthologues to BTN3 from mammalian species susceptible to IAVs (canine – *Canis*  
32 *lupus familiaris*, equine - *Equus caballus*, and porcine - *Sus scrofa*), distant galline

1 (*Gallus gallus*) and anatine (*Anas platyrhynchos*) BTN1 orthologues, and the human  
2 paralogues of the butyrophilin superfamily did not inhibit PR8 or Mallard, supporting  
3 a *Catarrhini* origin of BTN3 antiviral activity (Fig. 3b, Extended Data Fig. 4). Our  
4 phylogenetic analysis which considers each *Haplorrhini* BTN3 protein domain  
5 individually is consistent with previously documented recombination and  
6 homogenisation of the IgV domain within the BTN3 *Catarrhini* gene subfamily<sup>32</sup>  
7 (Extended Data Fig. 5). This incongruence in the evolutionary history of these genes  
8 could explain the multiple gains/losses of antiviral function.

9 **NP residue 313 is a key determinant of sensitivity/resistance to BTN3A3.** To  
10 identify the viral genetic determinants of BTN3A3 sensitivity or evasion, we  
11 engineered reassortants between PR8 and Mallard and tested their ability to  
12 replicate in BTN3A3-overexpressing MDCK cells (Extended data Fig. 6a). All PR8-  
13 based reassortants formed plaques as efficiently as wild type virus in BTN3A3-  
14 expressing cells apart from those containing Mallard segment 5 (Extended data Fig.  
15 6b). The opposite phenotype was seen in Mallard-based reassortants in which only  
16 viruses containing PR8-segment 5 (specifically Mallard with PR8 containing  
17 segments encoding for the viral ribonucleoproteins) managed to successfully form  
18 plaques in BTN3A3-overexpressing MDCK. We were unable to rescue the single  
19 segment reassortant Mallard 7:1 PR8 Segment 5. Hence, we engineered the  
20 reciprocal segment 5 reassortants between Mallard and Cal04. We assessed virus  
21 propagation in A549-Empty and BTN3A3 expressing cells (A549-BTN3A3), and  
22 confirmed that Mallard segment 5 conferred a BTN3A3 sensitive phenotype (Fig. 4a).  
23 Segment 5 is monocistronic and encodes for the viral nucleoprotein (NP)<sup>33</sup>. To  
24 identify the amino acid residue/s in NP determining the sensitivity or resistance to  
25 BTN3A3, we compared the NP sequences of the five human and five avian IAVs  
26 tested in Fig. 3d. Human and avian NP sequences have conserved differences in  
27 residues 33, 100, 136, 313, 351, 353 and 357. Of these, positions 33, 100, 313 and  
28 357 have been previously associated with avian-to-human transmission<sup>34</sup>. We  
29 rescued PR8 or Mallard single NP mutants and assessed their replication in A549-  
30 Empty or A549-BTN3A3. Using a PR8 background, we observed no reduction in  
31 virus yields in A549-BTN3A3 for any mutants except for PR8-Y313F. Conversely, on  
32 a Mallard-background the R100V mutant resulted in partial loss of BTN3A3  
33 sensitivity but F313Y evaded BTN3A3 restriction almost completely (Fig. 4b;

1 Extended Data Fig. 7). Therefore, we conclude that amino acid residue 313 is a key  
2 determinant of BTN3A3 sensitivity/evasion.

3 We next reconstructed a time-calibrated phylogenetic tree for a comprehensive set  
4 of more than 30,000 IAV NP sequences (Fig. 4c). Human NP sequences have  
5 almost exclusively 313Y or 313V while all NP clades circulating in avian hosts, as  
6 well as the Eurasian avian-like H1N1 swine clade, are dominated by strains with the  
7 conserved 313F residue. Less than 1% of avian IAV NP sequences contain 313L,  
8 which also confers susceptibility to BTN3A3 (Extended Data Fig. 7). Occurrence of  
9 the BTN3A3-resistant 313Y is specific to a human NP clade, derived from the H1N1  
10 1918 pandemic, subsequently reassorted into the 1957 and 1968 pandemics and  
11 currently circulating as seasonal H3N2. Precise dating of the original F313Y change  
12 is difficult due to the small number of 1918 IAV genomes available. However,  
13 recently sequenced early pandemic genomes all have a 313Y in NP<sup>35</sup>, suggesting  
14 that F313Y took place prior to or soon after human emergence of the 1918 H1N1  
15 human strain. 313V is specific to the classical swine H1N1 NP subclade, which  
16 entered the human population in the 2009 IAV pandemic. BEAST (Bayesian  
17 Evolutionary Analysis Sampling Tree) tip-dating analysis supports a F313V change  
18 taking place in swine hosts between mid-2002 and the end of 2006 (Text S1,  
19 Extended Data Fig. 8). Interestingly, the NP of the H1N1 2009 pandemic virus, was  
20 acquired from this 313V subclade. We have therefore tested if, similarly to PR8, the  
21 reversion of NP V313F in a pmd09 virus would result in a BTN3A3 sensitive virus.  
22 Indeed, unlike its wild-type (WT) counterpart, the Cal04 NP V313F mutant showed a  
23 very pronounced restriction in BTN3A3 overexpressing cells (Fig. 4d). Interestingly,  
24 residue 313 had been previously associated with evasion of Mx1 resistance<sup>19,20</sup>.  
25 Avian-to-human mutation F313Y, when combined with R100V and/or L283P, exhibits  
26 increased Mx1 sensitivity<sup>19</sup>. However, here we observed that the single F313Y  
27 mutation while it is sufficient to overcome BTN3A3, does not overcome Mx-1  
28 restriction (Fig. 4e). In addition, we showed in loss of function experiments that  
29 BTN3A3 restriction occurs in an Mx1-independent manner (Extended Data Fig. 9).

30 We further validated the role of NP residue 313 as a determinant of resistance to  
31 BTN3A3 in an experimental model of influenza *in vivo*. B6 mice were intranasally  
32 transduced with AAV6.2FF vectors expressing either BTN3A3 or GFP and infected  
33 with a reassortant Cal04 (6:2 PR8 HA/NA) containing the glycoproteins of PR8 to



1 maximise replication in mouse tissues, with or without the V313F mutation. As  
 2 shown in similar studies<sup>36</sup>, the AAV achieved efficient expression of our genes of  
 3 interest in the mouse respiratory tract. We observed abundant GFP (control) and  
 4 BTN3A3 expression in the respiratory tract of mice at 3 weeks post AAV-  
 5 transduction (Fig. 4f). In challenged mice, Cal04 (6:2 PR8 HA/NA) virus replication in  
 6 the lungs was not significantly impaired in BTN3A3 transduced mice compared to  
 7 controls. Conversely, titres reached by the single mutant Cal04-V313F in BTN3A3  
 8 transduced mice were significantly lower than those reached in GFP transduced  
 9 mice (Fig. 4g), indicating that BTN3A3 restriction can also occur *in vivo*.

10 **BTN3A3 interferes with avian IAV viral RNA transcription.** NP is an essential  
 11 protein for the life cycle of IAVs. Its primary purpose being the encapsidation of the  
 12 viral genome to ensure effective RNA transcription, replication and packaging<sup>37</sup>. As  
 13 well as being a structural RNA-binding protein, NP is also a key adapter between  
 14 virus and host cell processes as it is essential for the nucleo/cytoplasmic trafficking  
 15 of viral ribonucleoproteins (vRNPs)<sup>37-39</sup>. Hence, we next tested whether BTN3A3  
 16 inhibits vRNP nuclear import by performing synchronised infections of A549-empty  
 17 or A549-BTN3A3 followed by nuclear/cytoplasmic fractionation at early time points.  
 18 At 45 minutes post infection, levels of Mallard vRNP-containing proteins in both  
 19 cytoplasmic and nuclear fractions were equal between A549-Empty and BTN3A3  
 20 expressing cells, suggesting equally efficient virus entry and vRNP nuclear import  
 21 (Fig. 5a left panel, and related quantification in Extended Data Fig. 10). At 90  
 22 minutes post infection, by which point the transcription and translation of viral genes  
 23 had resulted in an increase in viral protein, a difference in viral protein levels was  
 24 seen between the two cell lines in both cytoplasmic and nuclear fractions (Fig. 5a  
 25 middle panel, Extended Data Fig. 10). This difference was further amplified at 6 hpi  
 26 (Fig. 5a right panel, Extended Data Fig. 10). Hence, these data suggested that the  
 27 initial stages of the virus life cycle including binding and entry, and likely vRNP  
 28 nuclear import were largely unaffected by BTN3A3 overexpression while subsequent  
 29 steps, such as viral transcription and/or translation were affected. To investigate this  
 30 further, we next studied viral transcription and translation using minireplicon reporter  
 31 assays. Using either vRNA- or cRNA-like reported plasmids, replication/transcription  
 32 by full avian or 313F recoded mammalian RNPs were significantly reduced in  
 33 BTN3A3 overexpressing cells (Fig. 5b; Extended Data Fig. 11). In principle, this



1 could be due to effects on viral transcription, translation or protein stability. In  
2 infected cells, viral transcription activity can be analysed by measuring vRNA, mRNA  
3 and cRNA levels through time. When infecting cells with Mallard WT (Fig. 5c, top  
4 row), initial vRNA levels were equal between A549-Empty and A549-BTN3A3 cells.  
5 However, a 7.5-fold difference in mRNA levels was observed from as early as 30  
6 minutes post infection in BTN3A3 expressing cells. This was matched by a similar  
7 reduction in the accumulation of cRNA and vRNA, which rely on the expression of  
8 new viral proteins. However, when using the BTN3A3-resistant mutant Mallard NP  
9 F313Y, there were no differences in vRNA, mRNA and cRNA levels in the presence  
10 or absence of BTN3A3 (Fig. 5c, bottom row). We concluded that BTN3A3 can  
11 restrict sensitive IAVs at the level of viral transcription.

12 Interestingly, we also found components of the ribonucleoprotein complex to co-  
13 immunoprecipitate with BTN3A3. However, to overcome the non-specific binding of  
14 NP to Protein A agarose beads, the BTN3A3 IP was performed using the  
15 supernatants of NP immunoprecipitates (Extended Data Figure 12). IAV transcription  
16 takes place in the nucleus, and despite BTN3A3 being a transmembrane protein,  
17 localisation of constitutively expressed BTN3A3 in hBEC3-KT cells was  
18 predominantly nuclear (Fig. 5d). Image analysis of infected cells showed that, when  
19 cells express high levels of nuclear BTN3A3, viral protein synthesis (measured by  
20 NP accumulation) of Mallard WT was weaker (Fig. 5d-f and Extended Data Fig. 13a-  
21 c). Additionally, NP accumulation from a BTN3A3-resistant mutant was less sensitive  
22 to high levels of nuclear BTN3A3. We obtained similar data using the same assays  
23 with Cal04 (BTN3A3 resistant) and the BTN3A3-sensitive mutant Cal04 NP V313F  
24 (Extended Data Figure 13).

25 **NP residue 52 is a key determinant of sensitivity/resistance to BTN3A3**  
26 **associated with recent avian IAVs spillovers into humans.** We next analysed  
27 whether BTN3A3 evasion could correlated with the zoonotic potential of avian IAVs.  
28 We focused on H7N9 avian IAVs whose NP contains a 313F residue and  
29 theoretically should be restricted by BTN3A3. However, their high number of human  
30 infections<sup>40</sup> led us to hypothesise that they might overcome BTN3A3 restriction,  
31 through an alternative mechanism. We therefore used a 6:2 H7N9 reassortant  
32 (containing the glycoproteins from PR8 and the internal segments from H7N9) and  
33 infected A549-Empty and A549-BTN3A3. The reassortant H7N9 was not restricted

1 significantly by BTN3A3, despite possessing 313F in NP, whereas as a 5:3 H7N9  
2 reassortant containing Mallard NP was restricted ~70 fold on average (Fig. 6A).  
3 Comparison of H7N9 and Mallard NP sequences highlighted differences at 8 residue  
4 positions (34, 52, 186, 352, 373, 377, 406 and 482). To determine whether any of  
5 these amino acid substitutions could enable H7N9 viruses to evade BTN3A3  
6 restriction, we constructed and tested single residue substitution mutants, and  
7 identified that the NP substitution N52Y rendered H7N9 sensitive to BTN3A3 (Fig.  
8 6a). The effect of 52N was only seen in the presence of 313F; the N52Y mutation  
9 was not sufficient to confer BTN3A3-sensitivity in the presence of 313Y (Figure 6b).  
10 Unlike NP residue 313, there are no distinct host-clade associations with the identity  
11 of amino acid residue at position 52 (Fig. 6c). Instead, 52N-coding NP sequences  
12 occur in multiple independent avian IAV lineages. We noted that, with the exception  
13 of the H5 serotype, position 52 of human isolates from the avian clade have not only  
14 residue N but also residues Q or H (Fig. 6d). We show that mutants engineered with  
15 the 52Q and 52H in either the Mallard or the H7N9 backgrounds result in BTN3A3  
16 evasion as efficiently as those possessing 52N (Fig.6e), further reinforcing the  
17 hypothesis that BTN3A3 evasion is a key phenotype of avian IAVs spilling over into  
18 humans. Interestingly, despite being separated in the primary sequence of NP,  
19 positions 52 and 313 are closely juxtaposed within the NP head domain (Fig. 6f).  
20 Moreover, both residues are located on the surface of the NP trimer, indicating that  
21 they would be accessible to interactions with other viral and host factors when NP  
22 oligomerises to form a vRNP (Figure 6g). Of note, 52Y exhibits a protuberant  
23 alkaline methylphenol-containing side chain, while N, Q and H side chains are polar,  
24 likely not occupying the same space around 313F (Fig. 6h).

25 Interestingly, NP residues 52 has also been implicated in the evasion of Mx1  
26 resistance<sup>19,20</sup>. However, Mx1 and BTN3A3 differ in how viral sensitivity/resistance  
27 depends on NP residues 52 and 313 (Extended Data Fig. 14). The evasion of  
28 BTN3A3 restriction conferred by residue 52, is dependent on residue 313, which is  
29 not the case for evasion of Mx1 restriction.

30

## 31 Discussion

1 IAVs host range is determined by multiple species-specific interactions between viral  
2 and cellular factors<sup>12</sup>. Our data reveal that human BTN3A3 is a powerful barrier for  
3 avian, but not human IAV replication. BTN3A3 interferes with avian IAV viral RNA  
4 transcription. Butyrophilins were discovered originally as proteins involved in  
5 lactation and milk production, but they are now known to have immunomodulatory  
6 functions<sup>3,40-42</sup>. These group of proteins have not been generally associated with  
7 antiviral properties, although one of two studies using ISG libraries against Ebola  
8 virus replicons identified BTN3A3 as a restriction factor for this virus<sup>43,44</sup>.

9 IAVs susceptibility to BTN3A3 restriction is determined by the NP protein and maps  
10 primarily to amino acid residues 313 and 52. Avian viruses almost universally  
11 possess NP 313F (resulting in a BTN3A3 susceptible genotype). A small minority  
12 (less than 1%) of avian IAVs possess the 313L residue, which also confers  
13 susceptibility to BTN3A3. Human viruses almost always possess either 313Y or  
14 313V (BTN3A3 resistant genotype).

15 The anti-IAV properties of BTN3A3 arose in primates. Hence, humans are the only  
16 species naturally infected with IAVs that restrict avian IAVs replication through this  
17 effector. Neither avian species nor swine, dogs or horses impose a BTN3A3-related  
18 selective pressure on the NP 313 residue. Importantly, the swine 2009 pandemic  
19 originated from a BTN3A3 resistant NP 313V clade, that we estimate appeared in  
20 pigs between 2002 and 2006, ahead of the 2009 pandemic (Extended Data Fig. 8).  
21 The strong conservation of residue 313F in avian IAVs is suggestive of purifying  
22 selection on this site during circulation in birds. Conversely, strains with both 313F  
23 and V genotypes circulate in pigs. This indicates relaxed selection on the virus for  
24 313F in swine, potentially allowing for occasional changes to BTN3A3-resistant  
25 residues. While the current data support a F313V change during circulation of the  
26 virus in swine ahead of the 2009 pandemic, there are no sequences available of the  
27 earliest intermediate viruses in this clade. Given the reassortment promiscuity of  
28 these viruses and reports of sporadic swine-to-human transmission in the late 1990s  
29 and early 2000s<sup>45</sup>, the residue change taking place in a non-swine host followed by a  
30 back-spillover event remains a possibility for the origin of the 2009 pandemic virus.

31 We show that evasion of BTN3A3 restriction is a conserved trait of avian viruses that  
32 have successfully spilled over into humans. To date, avian influenza viruses of

1 subtypes H3, H5, H6, H7, H9 and H10, have crossed the species barrier and caused  
 2 human infections<sup>9</sup>, despite maintaining the avian-like NP-313F. We have shown that  
 3 viruses that evade BTN3A3 restriction have mutated from a BTN3A3-sensitive 52Y  
 4 residue to a BTN3A3-resistant N, Q or H residue. We hypothesise that residue 52  
 5 masks the effect of 313F. Interestingly, the majority of IAV isolates from horses and  
 6 dogs also contains a resistant BTN3A3 genotype (313F and 52H). Similar examples  
 7 of “avian-to-human” adaptive mutations have occurred in PB2, most notably at  
 8 residue 627<sup>12,46</sup> which is a glutamic acid in avian viruses and adapts to a lysine in  
 9 human viruses such as those that caused the 1918, 1957 and 1968 pandemics, and  
 10 their seasonal descendant viruses. However, PB2 adaptation of the 2009 pandemic  
 11 virus occurred through alternative mutations in amino acid residues 271, 590 and  
 12 591, which are structurally close to 627<sup>47</sup>.

13 An apparent exception to BTN3A3 representing a key barrier to avian IAVs spillover  
 14 into humans are avian H5 viruses, which can infect humans despite many of them  
 15 possessing a BTN3A3-susceptible genotype (52Y, 313F). The viruses of the H5  
 16 subtype are highly pathogenic strains containing polybasic cleavage sites that may  
 17 allow a wider cellular tropism, and potentially infect low-BTN3A3 expressing cells,  
 18 leading to a higher chance of a successful infection<sup>48,49</sup>. Alternatively, other  
 19 compensatory mutations, even in segments other than segment 5, may provide  
 20 resistance. In recent years, the A/Goose/Guangdong/1/96 (GsGd) lineage of highly  
 21 pathogenic avian influenza (HPAI) H5 virus, originally emerged in Asia, have caused  
 22 an increasing number of outbreaks in wild birds and poultry across multiple  
 23 continents<sup>50</sup>. The frequency of these outbreak has increased substantially in Europe  
 24 since late 2020. Worryingly, out of 480 avian H5N1 isolates sampled between  
 25 January 2021 and June 2022 in Europe (Tables S3-S4), 277 have a BTN3A3  
 26 resistant genotype<sup>50</sup>. In the same period, transmission of HPAI H5 viruses to humans,  
 27 and other wild mammals, have been reported both in Europe, Asia and North  
 28 America. 3 of 6 zoonotic cases have been caused by Gs/GD HPAI H5 viruses with a  
 29 BTN3A3 resistant genotype (Table S5)<sup>51</sup>, providing opportunities for further virus  
 30 adaptation to humans.

31 We noted how both NP residues 313 and 52 have been associated with evasion of  
 32 Mx1 resistance<sup>19,20</sup>. We presented data *in vitro* clearly suggesting that despite  
 33 affecting similar stages of the virus life cycle, and through common amino acid

residues, BTN3A3 acts independently from Mx1. Also, our experiments *in vivo* were carried out in regular C57BL/6 mice transduced with AAV vectors expressing BTN3A3. C57BL/6, like many other laboratory mouse strains possess a non-functional Mx1, further reinforcing the point that BTN3A3 and Mx1 act independently from each other<sup>27</sup>. It is however relevant that two independent human restriction factors target a conserved surface of NP, suggesting that this constrained region is a key determinant of the zoonotic potential of avian IAVs.

Global efforts during the SARS-CoV-2 pandemic and over the years for IAV infections<sup>2</sup> have shown that surveillance based on virus genomic sequences can be a useful tool not only to provide insight into disease spread and epidemiology, but also for the early identification of viruses with specific undesirable phenotypic traits from a public health perspective. With the possible exception of some H5 sub-types, a BTN3A3 resistant genotype appears to be a pre-requisite for avian IAV spillover in humans. Among the ~13,000 avian IAV NP sequences available in the present dataset, we found 151 independent avian NP lineages which already apparently possess a BTN3A3 resistant genotype. Members of these lineages have been sampled across the globe, with hotspots in China and North America correlating with sampling efforts (Extended Data Fig. 15). Hence, it is likely unpredictable where the next BTN3A3 resistant lineage will occur. Overall, the data presented in this study provides a new outlook on the zoonotic potential of avian IAVs. Identifying the viral genotypes that determine BTN3A3 resistance/evasion can be a powerful additional marker for assessing the zoonotic potential of avian and animal IAVs and should be considered in risk-assessment frameworks<sup>2</sup>.

## Materials and methods

**Cells and viruses.** MT4 suspension cells were cultured in RPMI (RPMI, Gibco) 1640 medium supplemented with 10% foetal bovine serum (FBS, Gibco), 100 U/mL penicillin and 100 µg/mL streptomycin. Madin-Darby canine kidney (MDCK) cells (ATCC), human embryonic kidney cells (293T) (ATCC), human adenocarcinomic alveolar basal epithelial cells (A549) (ATCC) were cultured in Dulbecco's modified Eagle's medium (DMEM, Gibco) supplemented with 10% foetal bovine serum (FBS, Gibco), 100 U/mL penicillin and 100µg/mL streptomycin. MDCK cells expressing

1 Sialyltransferase 1 (MDCK-SIAT, kindly gifted by Prof John McCauley, The Francis  
2 Crick Institute) were further supplemented with 50 µg/mL geneticin.

3 hTERT-immortalized primary human foetal lung fibroblasts were cultured in minimum  
4 essential medium supplemented with 10% FBS, 100 U/mL penicillin, 100 µg/mL  
5 streptomycin and 1x non-essential amino acids. Normal human bronchial epithelial  
6 cells immortalised with CDK4 and hTERT (hBEC3-KT)<sup>52</sup> were kept in Keratinocyte  
7 serum-free medium (Gibco) supplemented with 50 µg/mL of bovine pituitary extract,  
8 5 ng/mL of human recombinant epidermal growth factor, 100 U/mL penicillin and 100  
9 µg/mL streptomycin.

10 Culture media of SCRPSY-modified cells was further supplemented with 1 µg/mL of  
11 puromycin dihydrochloride. All cell lines were regularly tested for mycoplasma  
12 contamination and passaged once or twice weekly.

13 PR8, Cal04, Mallard and Anhui H7N9 viruses were generated by reverse genetics  
14 essentially as described previously<sup>53</sup>. Briefly, ~2x10<sup>6</sup> 293T cells were transfected in  
15 OptiMEM with pDUAL reverse genetics plasmids (250 ng plasmid for each virus  
16 segment), using 4µL of Lipofectamine 2000 according to manufacturer's instructions.  
17 Twenty-four hours post transfection, the media was changed to serum-free DMEM  
18 supplemented with 0.14 % Bovine Serum Albumin (w/v) and 1 µg/mL L-(tosylamido-  
19 2-phenyl) ethyl chloromethyl ketone (TPCK)-treated trypsin. Virus-containing  
20 supernatant was collected after a further 2-day incubation and propagated in MDCK  
21 cells. Clarified supernatant was collected when approximately 90% of cells  
22 demonstrated cytopathic effect (typically 36 – 72 h post-infection).

23 **Arrayed ISG overexpression screening.** Lentiviral transduction/flow cytometry-  
24 based screening was performed as previously described<sup>24,25</sup>. Briefly, MT4 cells were  
25 seeded in 96-well plates and further transduced with two SCRPSY-based lentiviral  
26 vector libraries consisting of 527 human and 344 macaque ISGs. At 48 hours post  
27 transduction, cells were infected with either PR8-GFP, Mallard-GFP or Cal04 7:1  
28 PR8 segment 8 GFP (rescued as previously described<sup>54</sup>). After 10 h, cells were fixed  
29 and the percentage of transduced (TagRFP-positive) and IAV-infected (GFP-positive)  
30 cells was determined by flow cytometry using a Guava EasyCyte flow cytometer  
31 (Millipore).



1 The screens in figure 3A were performed in a similar manner. MT4, AA2 A549 or  
 2 A549 overexpressing human ACE2 were transduced with lentiviral ISG-expressing  
 3 library as described above<sup>55</sup>. Forty-eight hours post transduction, cells were infected  
 4 with reporter-expressing virus aiming to achieve a 10-50% infection. The panel of  
 5 viruses used in figure 3A was created with the following viruses: AdV, Human  
 6 mastadenovirus C (Adenovirus 5); PRV, Suid herpesvirus 1 (Pseudorabies); HSV-1,  
 7 Human herpesvirus 1; BoHV-1, Bovine herpesvirus 1; RVFV, Rift Valley fever  
 8 phlebovirus; SFTSV, Dabie bandavirus (Severe fever with thrombocytopenia  
 9 syndrome virus); BUNV, Bunyamwera orthobunyavirus; BTV, Bluetongue virus;  
 10 Rotavirus, Simian Rotavirus A/SA11; CHPV, Chandipura vesiculovirus; VSV, Indiana  
 11 vesiculovirus; SFV, Semliki Forest virus; CHIKV, Chikungunya virus; HIV-1, Human  
 12 immunodeficiency virus 1; IAV PR8, A/Puerto Rico/8/1934 (H1N1); IAV Cal04,  
 13 A/California/04-061-MA/2009 (H1N1) rescued with PR8 segment 8; IAV Mallard,  
 14 A/Mallard/Netherlands/10-Cam/1999 (H1N1); MeV, Measles Ed-Zag vac; SeV,  
 15 Murine respirovirus (Sendai virus); PIV5, Mammalian orthorubulavirus 5  
 16 (Parainfluenza virus 5 or simian virus 5); hMPV, human Metapneumovirus; hRSV,  
 17 human orthopneumovirus (human respiratory syncytial virus); bRSV, Bovine  
 18 orthopneumovirus (bovine respiratory syncytial virus); PIV3, human respirovirus 3  
 19 (Parainfluenza virus 3); and ZIKA, Zika virus.

20 **Influenza A virus infection.** Monolayers of A549, MRC5T and hBEC3-KT cells  
 21 were washed once with PBS and infected with virus diluted in serum-free medium for  
 22 1h at 35°C or 37°C (MOI used is specified in the relevant figures). Medium was  
 23 replaced with complete maintaining medium (for qRT-PCR or western blot analysis)  
 24 or serum-free medium supplemented with 0.14%BSA and 1 µg/mL TPCK-treated  
 25 bovine pancreas trypsin (growth kinetics and quantification of infectious virus titres).  
 26 Infectious titres were determined by plaque assay.

27 **Virus quantification by plaque assay.** Confluent monolayers of MDCK cells ( $5 \times 10^5$   
 28 or  $1 \times 10^6$  cells seeded the day before infection in 12- or 6-well plates, respectively)  
 29 were washed once with PBS, infected with 10-fold serial dilutions of virus and  
 30 incubated for 1 h at 37°C to allow virus adsorption to the cells. After virus removal,  
 31 cells were overlaid with DMEM including 0.14% BSA, 1 µg/mL TPCK-treated trypsin  
 32 and 1.2% Avicel and incubated for 3 days at 37°C, 5% CO<sub>2</sub>. After removing the  
 33 overlay, cells were fixed with PBS/4%formaldehyde and stained with a



1 20%methanol/ 10% acetic acid/ 0.2% Coomassie Blue solution for at least 1h.  
2 Staining solution was rinsed under tap water, plates were air-dried and plaques were  
3 then counted. Plaque assays for the avian viruses A/wild-duck/Italy/17VIR6926-  
4 1/2017 H5N2, A/duck/Italy/18VIR4932-2/2018 H7N7 and A/turkey/Italy/16VIR8643-  
5 54/2016 H9N2 were performed as described but using MDCK cells overexpressing  
6 galline ANP32A. Plaque assays for Cal04 backbone viruses were performed  
7 essentially as described but using MDCK-SIAT cells and a 3-day incubation period at  
8 35°C. Cells were then fixed, fixing solution was removed and cells were washed with  
9 PBS and permeabilised using PBS/0.2% (v/v) Triton X-100 for 10 minutes. After two  
10 PBS washes, cells were incubated with a mouse anti-NP antibody (diluted 1:1000 in  
11 PBS/ 2% BSA) for 1 h on a rocking platform at room temperature. Following two PBS  
12 washes, cells were incubated with goat anti-mouse IgG-HRP conjugated secondary  
13 antibody (diluted 1:1000 in PBS/ 2% BSA) for 1h in the same conditions. Cells were  
14 washed three times with PBS, TrueBlue peroxidase substrate was then added, and  
15 cells were incubated at room-temperature covered from direct light. When blue-  
16 stained plaques were visible, cells were washed with water, allowed to dry, and  
17 plaques were counted (under a stereo microscope, if required).

18 **siRNA-mediated gene silencing.** MCR5T ( $5 \times 10^5$  cells/well), hBEC3-KT ( $5 \times 10^5$   
19 cells/we//) or A549-based cells ( $3.5 \times 10^5$  cells/well) were seeded before transfection  
20 of siRNA molecules targeting BTN3A3 or Mx1. When transfecting, 20 pmol of siRNA  
21 was used with 3  $\mu$ L of DharmaFECT 2 (Horizon Discovery) per well according to the  
22 manufacturer's protocol.

23 **Minireplicon polymerase reporter assay.** Sub-confluent monolayers of A549-  
24 Empty and A549-HsBTN3A3 cells ( $2 \times 10^5$  cells seeded in 24-well plates the previous  
25 day) were co-transfected in triplicate with 150 ng of each pDUAL plasmid encoding  
26 PB2, PB1, PA and NP along with 20 ng of transfection control plasmid (CMV-driven  
27 expression of Renilla luciferase) and 50ng of a Poll-driven expression of vRNA or  
28 cRNA-like firefly luciferase reporter plasmids. As a negative control, transfections  
29 lacking the NP plasmid (empty pDUAL vector was used to balance plasmid intake)  
30 were also performed. Two days post transfection, medium was removed and cells  
31 were lysed with 120  $\mu$ L of reporter lysis buffer. Cell debris was scraped off, lysates  
32 were collected into clean tubes and clarified by centrifugation (10,000 rpm for 5  
33 minutes at 4°C) in a benchtop centrifuge. Luminescence was measured from 50  $\mu$ L

of lysate in opaque 96-well plates by using the Dual-Luciferase® reporter assay system (injection speed: 200µL/second; gap: 0.5 seconds; integration time: 10 seconds).

**RT-qPCR.** Total RNA of infected cells was extracted from culture supernatants using the RNeasy Blood kit (Beckman Coulter Life Sciences), including a DNase treatment, following the manufacturer's instructions. Extracted and DNase-treated RNA was used to perform strand-specific 2-step qRT-PCR targeting the three different influenza RNA species, as previously described<sup>56</sup>. Briefly, a 5' tagged primer is used for the cDNA synthesis, the reverse complement of which was then used as a forward primer in the real-time PCR step. Therefore, even in the event of primer-unspecific cDNA synthesis only the cDNA generated with the tagged primer will be detected and amplified in the real-time PCR. cDNA synthesis was performed with 5 µL of extracted RNA using the RevertAid kit (ThermoFisher) in a Veriti™ 96 well Thermal Cycler. qPCR reactions were performed with 2 µL of cDNA using the Brilliant III Ultra-Fast qPCR mastermix. qPCR was performed and analysed using the QuantStudio® 3 thermocycler and software systems (ThermoFisher Scientific). A list of primers and probes can be found in supplementary information. In vitro-synthesised T7-transcribed viral mRNA, vRNA and cRNA-like transcripts were diluted and used as a standard curve. Relative quantification of viral RNA species was performed against GAPDH.

**Cell fractionation.** A549-Empty and A549-HsBTN3A3 cells were infected with PR8 and Mallard WT viruses at an MOI of 3 for either 45 minutes, 90 minutes or 6 h. Cells were then washed in ice-cold PBS and lysed with 50 mM Tris-HCl pH 7.5, 10 mM KCl, 5 mM MgCl<sub>2</sub>, 0.5% NP40, 1 mM DTT, 10mM sodium b-glycerophosphate and Halt Protease inhibitor (1X, EDTA-free) (Thermo Fisher, 78429). Lysates were kept on ice for ten minutes (gently vortexed every 2-3 minutes) and centrifuged at 1000g for 5 minutes at 4°C. The supernatant (cytoplasmic fraction) was transferred to a clean 1.5 mL tube and the nuclear fraction was washed thrice with the above-mentioned lysis buffer (centrifugations done for 5 minutes at 1000 g). The nuclear fraction was then incubated on ice for 30 minutes with 2X LDS (Thermo Fisher, NP0007), 2X sample reducing agent (Thermo Fisher, NP0004), Denarase (final activity – 25U/ml) (c-LEcta, 20804-100k) and 10 mM MgCl<sub>2</sub>. The nuclear fraction was sonicated ten times for 20 seconds with 10 second intervals, before being

centrifuged at 12000 g for 15 minutes. The supernatant was collected, and the pellet discarded. The cytoplasmic fraction was denatured using 1X LDS and 1X sample reducing agent.

**Immunoprecipitation.** hBEC3-KT cells were infected with Mallard WT and NP F313Y at an MOI of 3 for 6h and lysed as previously described<sup>57</sup>. Lysates were preclarified overnight at 4°C with protein A agarose beads (Sigma Aldrich, P3476). 4 mg of protein lysates were then incubated with 12 µg of either anti-NP or IgG control antibody overnight at 4°C. Supernatants from the α-NP and IgG control were further incubated overnight at 4°C with 12 µg of anti-BTN3A3 and IgG control antibody, respectively. Fifteen µL of Protein-A agarose beads were added for an hour the next morning. IPs were then washed with 50 mM Tris-HCl, 500mM sodium chloride and 0.5% TritonX-100 followed by 50 mM Tris-HCl only before being eluted using 2X LDS and 2X sample reducing agent. Immunoprecipitates were lysed and further subjected to immunoblotting targeting NP, PB2, PB1, PA and BTN3A3.

**Immunoblotting.** Total cell, immunoprecipitates or lysates from fractionation experiments were heated at 80°C for 5 minutes and subjected to polyacrylamide gel electrophoresis using 3-(N-morpholino) propanesulfonic acid (MOPS) running buffer and transferred to polyvinylidene difluoride (PVDF) (Merck Millipore, IPFL00010) membranes at 30V for 90 minutes. Membranes were blocked for 1h with 1X Tris-buffered saline with 0.2% Tween® 20 (TBST)/5% milk, washed 4 times with 1xTBST and stained with primary antibodies diluted in 5% BSA BSA/0.01% sodium azide overnight at 4°C. After four 10-minute 1xTBST washes, secondary antibodies were diluted in blocking buffer and incubated for 1h at room temperature protected from direct light. Following four more washes in 1xTBST, membranes were imaged using the LI-COR CLx-Odyssey Imaging platform. Densitometry analysis was performed using the Image Studio™ Lite Software.

**Immunofluorescence staining.** The desired cell lines were seeded on 13 mm round glass coverslips in 24 well dishes. After infection/transfection, cells were washed twice with PBS and fixed with 4% formaldehyde in PBS for 20 minutes followed by three PBS washes. Cells were permeabilised with PBS/1% Triton X-100 for 10 minutes at room temperature. Following three washes with PBS, cells were blocked with 1 mL PBS/1% BSA for 1 hour followed by incubation for 1 hour with 200

1  $\mu$ L of primary antibodies at the appropriate dilutions (for the detection of BTN3A3 in  
2 hBEC3-KT cells, the primary antibody was incubated overnight at 4°C). Three 1 mL  
3 PBS/0.2% Tween20 washes were then executed to remove unbound antisera  
4 followed by incubation of secondary antibodies in the same volume. 4',6-Diamidino-  
5 2-phenylindole (DAPI) (100 ng/mL) was diluted in blocking buffer and incubated for  
6 10 minutes. When using HCS CellMask™ Deep Red Stain (2  $\mu$ g/mL – ThermoFisher  
7 Scientific), this was added after DAPI staining for 30 minutes followed by three PBS  
8 washes. After labelling steps were completed, coverslips were washed three more  
9 times with water and mounted upside down on glass slides with AF1 Mounting media  
10 (CitiFluor™). Coverslips were imaged using the ZEISS LSM 710 or LSM 880 (with  
11 Airyscan) confocal laser scanning microscopes. Quantification of nuclear and  
12 cytoplasmic proteins from confocal images was performed using a pipeline created  
13 on CellProfiler™. Pipeline details are provided in supplementary information.

14 **Immunohistochemistry.** Sections (3  $\mu$ m thick) of formalin-fixed and paraffin-  
15 embedded (FFPE) human lung and respiratory nasal epithelium (female, 52 years  
16 old, Asian, post-mortem donor, normal tissue; code: AMS-41022-NE and  
17 500029028-DS, Amsbio) were stained with a rabbit anti-BTN3A3 antibody (HPA  
18 007904, Atlas antibodies) for 1.5 hours at room temperature after pressure cooking  
19 in sodium citrate. For visualisation, EnVision Detection System HRP,  
20 peroxidase/DAB (rabbit, K500711, Agilent) was used according to manufacturer's  
21 instructions. The specificity of the antibody was validated on FFPE A549-Empty and  
22 A549-HsBTN3A3 cell pellets. Negative control sections included an isotype control  
23 on a consecutive serial section. Slides were scanned with a Leica Aperio Versa 8  
24 slide scanner (Leica Biosystems) and images were acquired with a Aperio  
25 ImageScope software (Leica Biosystems).

26 Mouse lung tissues were stained with a rabbit anti-BTN3A3 antibody (HPA 007904,  
27 Atlas antibodies) and anti-GFP antibody (#2555S, Cell Signaling) for 1.5 hours at  
28 room temperature after pressure cooking in sodium citrate. For visualisation,  
29 EnVision Detection System HRP, peroxidase/DAB (rabbit, K500711, Agilent) was  
30 used according to manufacturer's instructions.

31 **AAV vectors.** AAV vector genome plasmids were engineered to encode a  
32 ubiquitous CASI promoter<sup>58,59</sup> driving expression of the human BTN3A3 gene

1 followed by a WPRE<sup>59</sup> and a SV40 polyA signal all contained between AAV2  
2 inverted terminal repeats. AAV vectors were produced by co-transfection of human  
3 embryonic kidney 293 cells with genome and packaging plasmids as described  
4 previously<sup>59</sup>. Vectors pseudotyped with AAV6.2FF were purified by use of a heparin  
5 column<sup>59</sup>. AAV vector titres were determined by quantitative polymerase chain  
6 reaction (qPCR) analysis as described elsewhere<sup>60</sup>.

7 **Mouse infections.** Six week-old female C57BL/6 mice were purchased from Envigo  
8 (UK). Animals were maintained at the University of Glasgow under specific pathogen  
9 free conditions in accordance with UK home office regulations (Project License  
10 PP1902420) and approved by the local ethics committee. Following 7 days of  
11 acclimatization, the mice were briefly anesthetized using inhaled isoflurane and  
12 transduced with  $1 \times 10^{11}$  virus genomes of adeno-associated virus (AAV). Mice  
13 received either AAV-GFP or AAV BTN3A3 in 50  $\mu$ L PBS intranasally. Twenty-one  
14 days post AAV instillation mice were infected with Cal04 and Cal04 V313F (both 6:2  
15 with PR8 HA/NA). Mice were briefly anesthetized using inhaled isoflurane and  
16 intranasally infected with  $5 \times 10^3$  PFU of each virus in 20  $\mu$ L of PBS. All mice were  
17 euthanized by cervical dislocation 3 days post infection. Weight loss for all groups  
18 did not exceed the humane cut-off point of 20%. Group sizes were based on  
19 previous experiments<sup>61</sup>. Once euthanised, mouse lungs were extracted and frozen at  
20  $-80^{\circ}\text{C}$ . Lungs were thawed, weighted and homogenised with 1 mL of DMEM.  
21 Homogenates were cleared by centrifugation (3000 rpm,  $4^{\circ}\text{C}$ ) and titrated by plaque  
22 assay.

23 ***In silico* identification of BTN3 homologs.** To identify proteins expressed by other  
24 species, homologous to the human BTN3 genes, we performed a Blastp search  
25 (v.2.8.1) against all available members of the Haplorrhini suborder in the NCBI blast  
26 protein refseq database version 5 (e value cutoff  $1 \times 10^{-60}$ , as of 6th of April 2021)<sup>62</sup>.  
27 The human BTN3A3 protein sequence (NP\_008925.1) was used as a probe for the  
28 BLAST search. The isoform with the longest sequence was kept for each protein  
29 product annotated with the same name. Similarly, Blastp with human BTN3A3 was  
30 used for identifying proteins expressed by non-primate species susceptible to IAVs  
31 infection: *Gallus*, *Anas platyrhynchos*, *Equus caballus*, and *Sus scrofa* and more  
32 distant human paralogues (Table S1).

Protein members of the butyrophilin 3 subfamily retrieved from the BLAST search were manually cross-checked with proteins in the Ensembl database<sup>63</sup> and if the protein sequences were not identical between the two databases the sequence with highest similarity to the human BTN3A3 protein sequence was retained. A total of 30 proteins were retrieved from the following species: *Pan troglodytes*, *Cebus imitator*, *Equus caballus*, *Homo sapiens*, *Gorilla gorilla gorilla*, *Chlorocebus sabaeus*, *Macaca mulatta*, *Pongo abelii*, *Carlito syrichta*, *Mandrillus leucophaeus*, *Callithrix jacchus*, *Nomascus leucogenys*, *Rhinopithecus roxellana*.

A custom set of Pfam hmm profiles were used for identifying the conserved domains in the proteins, comprising the immunoglobulin V-set domain (PF07686), CD80-like C2-set immunoglobulin domain (PF08205), PRY (PF13765) and SPRY (PF00622) domains. All protein sequences were scanned with the profile set using hmmscan (HMMER 3.3)<sup>64</sup>. The best hit for each identified domain was extracted from the protein sequence aligned with the respective domain segments using mafft (v7.453, -maxiterate 1000 --localpair)<sup>65</sup>. Protein alignments were converted to codon alignments using pal2nal<sup>66</sup>. Phylogenies for each separate domain alignment (Extended data Fig. 5) and concatenated domain sequences (Figure 3a) were reconstructed using iqtree (version 1.6.12)<sup>67</sup> with the best suited substitution model selected by the iqtree '-m TEST' option and 10,000 ultrafast bootstrap replicates.

**IAVs phylogenetic analysis.** A total of 35,477 full-length NP coding sequences unique on the nucleotide level (identical sequences collapsed) were retrieved from the NCBI Flu database (<https://www.ncbi.nlm.nih.gov/genomes/FLU/Database/nph-select.cgi?go=database>), as of the 8th of June 2021, sampled until the end of 2020), only including type A influenza sequences annotated to have been isolated from avian, canine, equine, human and swine hosts. Sequences with ambiguous nucleotides and internal stop codons were removed, resulting in a dataset of 34,079 sequences. The corresponding protein sequences were aligned using mafft (v7.453, --maxiterate 1000 --localpair)<sup>65</sup> and then converted to a codon alignment with pal2nal<sup>66</sup>. Metadata associated with each sequence accession were retrieved and tabulated.

To reduce oversampling of related sequences the dataset was clustered with a minimum sequence identity of 0.99 using MMseqs2 (--min-seq-id 0.99 --cov-mode



0)<sup>68</sup>. One representative was kept from each cluster leading to a filtered dataset of 14,665 sequences. The codon alignment of the filtered set was used to reconstruct a phylogeny with iqtree under a GTR+I+G4 model (selected as the most appropriate model with the ‘-m TEST’ option)<sup>67</sup>. The resulting phylogeny was then time-calibrated using TreeTime<sup>69</sup> (Fig. 4c). Eleven sequences with annotated dates inconsistent with the root-to-tip regression were subsequently excluded from the analysis.

To explore the H7N9 epidemic NP clade in more detail, representative sequences from this broader avian NP clade (Fig. 6c) as well as the unfiltered sequences from each representative’s corresponding cluster were retrieved (3,150 sequences). The codon alignment of these NP sequences was used to infer a more detailed maximum likelihood phylogenetic reconstruction of this particular clade (iqtree under a GTR+I+F+G4 model with 10,000 Ultrafast bootstrap replicates)<sup>67,70</sup> and time-calibrated using TreeTime as described above<sup>69</sup> (Fig. 6c). All phylogenies were visualized using the ggtree R package<sup>71</sup>, unless stated otherwise. Tree statistics were analysed using the ete3 Python package<sup>72</sup>.

**Data availability.** Alignments and raw phylogenetic data related to this study can be found in the following GitHub repository: [https://github.com/spyros-lytras/BTN3A3\\_IAV](https://github.com/spyros-lytras/BTN3A3_IAV).

## Acknowledgments

We are thankful to the authors, originating and submitting laboratories of the sequences from GISAID’s EpiFlu™ Database on which some of this research is based (see Table S6). We thank Pablo Murcia (MRC-University of Glasgow Centre for Virus Research) for providing clinical virus isolates and fruitful discussions, and Professor Malik Peiris (The University of Hong Kong) who kindly gifted A/ruddy shelduck/Mongolia/963V/2009 (H3N8). We are grateful to Sushant Bhat, Munir Iqbal (The Pirbright Institute), Laurence Tiley, Ron Fouchier (Erasmus MC) and Daniel Perez (The University of Georgia) for providing the reverse genetics systems of the A/Anhui/1/2013 (H7N9) and A/Mallard/Netherlands/10-Cam/1999 (H1N1), A/Puerto Rico/8/1934 (H1N1) and A/California/04-061-MA/2009 (H1N1) viruses, respectively. We acknowledge Dr John Mccauley (The Crick Institute) for sharing the MDCK-SIAT



cells. This work was supported by the UK Medical Research Council (MC\_UU\_12016/10) awarded to MP and SJW and the following grants: Wellcome Trust 206369/Z/17/Z (to MP); Biotechnology and Biological Sciences Research Council (BBSRC) BB/P013740/1 awarded to FG and PD; BBSRC BB/S00114X/1 awarded to FG, PD and SJW; EU Horizon2020: DELTA-FLU (no 727922) awarded to PD and IM; Natural Sciences and Engineering Research Council of Canada (NSERC) Discovery Grant (RGPIN-2018-04737) awarded to SKW; Daphne Jackson Fellowship funded by Medical Research Scotland awarded to SS; MRC Career Development Award and Transition Support Award (MR/N008618/1 and MR/V035789/1) to EH; Wellcome Trust 210703/Z/18/Z awarded to MKLM; Medical Research Council MC\_UU\_12014/5 awarded to CB. GQ and JH are funded by Medical Research Council MC\_UU\_12014/12.

## Author's Contribution

Conceptualization: RMP, SJW, MP; Methodology: RMP, SB, MKZ, SL, SS, JCW, VH, KEH, LO, SKW, MKLM; Software: SL, JH, QG; Validation: RMP, SB, SL, MKZ, JCW, VH, KEH; Formal analysis: RMP, SB, SL, MKZ, SS, VH, MVk, NCR, MCR, MVa, JH; Investigation: RMP, SB, SL, MKZ, SS, JCW, VH, MVk, NCR, MCR, MVa, LO, AW, CL, YP, EV, MLT, WF, KEH, AT; Resources: RMP, AT, CB, EH, PD, IM, SKW, SJW, MP; Data curation: RMP, SL, MVk, NCR, MCR, MVa, AW, EV; Writing- original draft preparation: RMP, SB, SL, MKZ, JCW, VH, MLT, SKW, MP; Writing-Review & editing: RMP, SB, SL, MKZ, SS, JCW, VH, MVk, NCR, MCR, MVa, AW, CL, JH, EV, MLT, WF, KEH, QG, LO, AT, FG, EH, PD, IM, SKW, MKLM, SJW, MP; Visualization: RMP, SB, SL; Supervision: RMP, JH, CB, SKW, MKLM, SJW, MP; Project administration: SJW, MP; Funding acquisition: SS, CB, FG, PD, IM, SKW, MKLM, SJW, MP

## REFERENCES

- 1 Lipsitch, M. *et al.* Viral factors in influenza pandemic risk assessment. *Elife* **5**, doi:10.7554/eLife.18491 (2016).
- 2 Burke, S. A. & Trock, S. C. Use of Influenza Risk Assessment Tool for Prepandemic Preparedness. *Emerg Infect Dis* **24**, 471-477, doi:10.3201/eid2403.171852 (2018).
- 3 Afrache, H., Gouret, P., Ainouche, S., Pontarotti, P. & Olive, D. The butyrophilin (BTN) gene family: from milk fat to the regulation of the immune response. *Immunogenetics* **64**, 781-794, doi:10.1007/s00251-012-0619-z (2012).

- 1 4 Ye, Q., Krug, R. M. & Tao, Y. J. The mechanism by which influenza A virus  
2 nucleoprotein forms oligomers and binds RNA. *Nature* **444**, 1078-1082,  
3 doi:10.1038/nature05379 (2006).
- 4 5 Yoon, S.-W., Webby, R. J. & Webster, R. G. in *Influenza Pathogenesis and Control -*  
5 *Volume I* (eds Richard W. Compans & Michael B. A. Oldstone) 359-375 (Springer  
6 International Publishing, 2014).
- 7 6 Krammer, F. *et al.* Influenza. *Nature Reviews Disease Primers* **4**, 3,  
8 doi:10.1038/s41572-018-0002-y (2018).
- 9 7 Harrington, W. N., Kackos, C. M. & Webby, R. J. The evolution and future of  
10 influenza pandemic preparedness. *Experimental & Molecular Medicine* **53**, 737-749,  
11 doi:10.1038/s12276-021-00603-0 (2021).
- 12 8 Worobey, M., Han, G. Z. & Rambaut, A. Genesis and pathogenesis of the 1918  
13 pandemic H1N1 influenza A virus. *Proc Natl Acad Sci U S A* **111**, 8107-8112,  
14 doi:10.1073/pnas.1324197111 (2014).
- 15 9 Short, K. R. *et al.* One health, multiple challenges: The inter-species transmission of  
16 influenza A virus. *One Health* **1**, 1-13, doi:10.1016/j.onehlt.2015.03.001 (2015).
- 17 10 Liu, D. *et al.* Origin and diversity of novel avian influenza A H7N9 viruses causing  
18 human infection: phylogenetic, structural, and coalescent analyses. *Lancet* **381**,  
19 1926-1932, doi:10.1016/s0140-6736(13)60938-1 (2013).
- 20 11 Wang, X. *et al.* Epidemiology of avian influenza A H7N9 virus in human beings  
21 across five epidemics in mainland China, 2013–17: an epidemiological study of  
22 laboratory-confirmed case series. *The Lancet Infectious Diseases* **17**, 822-832,  
23 doi:[https://doi.org/10.1016/S1473-3099\(17\)30323-7](https://doi.org/10.1016/S1473-3099(17)30323-7) (2017).
- 24 12 Long, J. S., Mistry, B., Haslam, S. M. & Barclay, W. S. Host and viral determinants of  
25 influenza A virus species specificity. *Nature Reviews Microbiology* **17**, 67-81,  
26 doi:10.1038/s41579-018-0115-z (2019).
- 27 13 Rogers, G. N. & Paulson, J. C. Receptor determinants of human and animal  
28 influenza virus isolates: differences in receptor specificity of the H3 hemagglutinin  
29 based on species of origin. *Virology* **127**, 361-373, doi:10.1016/0042-6822(83)90150-  
30 2 (1983).
- 31 14 Di Lella, S., Herrmann, A. & Mair, C. M. Modulation of the pH Stability of Influenza  
32 Virus Hemagglutinin: A Host Cell Adaptation Strategy. *Biophys J* **110**, 2293-2301,  
33 doi:10.1016/j.bpj.2016.04.035 (2016).
- 34 15 Zaraket, H. *et al.* Increased acid stability of the hemagglutinin protein enhances  
35 H5N1 influenza virus growth in the upper respiratory tract but is insufficient for  
36 transmission in ferrets. *J Virol* **87**, 9911-9922, doi:10.1128/jvi.01175-13 (2013).
- 37 16 Long, J. S. *et al.* Species difference in ANP32A underlies influenza A virus  
38 polymerase host restriction. *Nature* **529**, 101-104, doi:10.1038/nature16474 (2016).
- 39 17 Blumenkrantz, D., Roberts, K. L., Shelton, H., Lycett, S. & Barclay, W. S. The short  
40 stalk length of highly pathogenic avian influenza H5N1 virus neuraminidase limits  
41 transmission of pandemic H1N1 virus in ferrets. *J Virol* **87**, 10539-10551,  
42 doi:10.1128/jvi.00967-13 (2013).
- 43 18 Park, S. *et al.* Adaptive mutations of neuraminidase stalk truncation and  
44 deglycosylation confer enhanced pathogenicity of influenza A viruses. *Sci Rep* **7**,  
45 10928, doi:10.1038/s41598-017-11348-0 (2017).
- 46 19 Mänz, B. *et al.* Pandemic influenza A viruses escape from restriction by human MxA  
47 through adaptive mutations in the nucleoprotein. *PLoS Pathog* **9**, e1003279,  
48 doi:10.1371/journal.ppat.1003279 (2013).
- 49 20 Riegger, D. *et al.* The nucleoprotein of newly emerged H7N9 influenza A virus  
50 harbors a unique motif conferring resistance to antiviral human MxA. *J Virol* **89**,  
51 2241-2252, doi:10.1128/jvi.02406-14 (2015).
- 52 21 Zhu, W. *et al.* A Gene Constellation in Avian Influenza A (H7N9) Viruses May Have  
53 Facilitated the Fifth Wave Outbreak in China. *Cell Rep* **23**, 909-917,  
54 doi:10.1016/j.celrep.2018.03.081 (2018).

- 1 22 Chen, Y. *et al.* Rare variant MX1 alleles increase human susceptibility to zoonotic  
2 H7N9 influenza virus. *Science* **373**, 918-922, doi:10.1126/science.abg5953 (2021).
- 3 23 Shaw, A. E. *et al.* Fundamental properties of the mammalian innate immune system  
4 revealed by multispecies comparison of type I interferon responses. *PLoS Biol* **15**,  
5 e2004086, doi:10.1371/journal.pbio.2004086 (2017).
- 6 24 Kane, M. *et al.* Identification of Interferon-Stimulated Genes with Antiretroviral Activity.  
7 *Cell Host Microbe* **20**, 392-405, doi:10.1016/j.chom.2016.08.005 (2016).
- 8 25 Schoggins, J. W. *et al.* A diverse range of gene products are effectors of the type I  
9 interferon antiviral response. *Nature* **472**, 481-485, doi:10.1038/nature09907 (2011).
- 10 26 Feeley, E. M. *et al.* IFITM3 inhibits influenza A virus infection by preventing cytosolic  
11 entry. *PLoS Pathog* **7**, e1002337, doi:10.1371/journal.ppat.1002337 (2011).
- 12 27 Staeheli, P., Grob, R., Meier, E., Sutcliffe, J. G. & Haller, O. Influenza virus-  
13 susceptible mice carry Mx genes with a large deletion or a nonsense mutation. *Mol*  
14 *Cell Biol* **8**, 4518-4523, doi:10.1128/mcb.8.10.4518-4523.1988 (1988).
- 15 28 Verhelst, J., Parthoens, E., Schepens, B., Fiers, W. & Saelens, X. Interferon-  
16 inducible protein Mx1 inhibits influenza virus by interfering with functional viral  
17 ribonucleoprotein complex assembly. *J Virol* **86**, 13445-13455, doi:10.1128/jvi.01682-  
18 12 (2012).
- 19 29 Wellington, D., Laurenson-Schafer, H., Abdel-Haq, A. & Dong, T. IFITM3: How  
20 genetics influence influenza infection demographically. *Biomed J* **42**, 19-26,  
21 doi:10.1016/j.bj.2019.01.004 (2019).
- 22 30 Rhodes, D. A., Stammers, M., Malcherek, G., Beck, S. & Trowsdale, J. The cluster of  
23 BTN genes in the extended major histocompatibility complex. *Genomics* **71**, 351-362,  
24 doi:10.1006/geno.2000.6406 (2001).
- 25 31 Kumar, S., Stecher, G., Suleski, M. & Hedges, S. B. TimeTree: A Resource for  
26 Timelines, Timetrees, and Divergence Times. *Mol Biol Evol* **34**, 1812-1819,  
27 doi:10.1093/molbev/msx116 (2017).
- 28 32 Afrache, H., Pontarotti, P., Abi-Rached, L. & Olive, D. Evolutionary and  
29 polymorphism analyses reveal the central role of BTN3A2 in the concerted evolution  
30 of the BTN3 gene family. *Immunogenetics* **69**, 379-390, doi:10.1007/s00251-017-  
31 0980-z (2017).
- 32 33 Pinto, R. M., Lycett, S., Gaunt, E. & Digard, P. Accessory Gene Products of Influenza  
33 A Virus. *Cold Spring Harbor perspectives in medicine* **11**,  
34 doi:10.1101/cshperspect.a038380 (2021).
- 35 34 Naffakh, N., Tomoiu, A., Rameix-Welti, M. A. & van der Werf, S. Host restriction of  
36 avian influenza viruses at the level of the ribonucleoproteins. *Annu Rev Microbiol* **62**,  
37 403-424, doi:10.1146/annurev.micro.62.081307.162746 (2008).
- 38 35 Patrono, L. V. *et al.* Archival influenza virus genomes from Europe reveal genomic  
39 variability during the 1918 pandemic. *Nat Commun* **13**, 2314, doi:10.1038/s41467-  
40 022-29614-9 (2022).
- 41 36 van Lieshout, L. P. *et al.* A Novel Triple-Mutant AAV6 Capsid Induces Rapid and  
42 Potent Transgene Expression in the Muscle and Respiratory Tract of Mice. *Mol Ther*  
43 *Methods Clin Dev* **9**, 323-329, doi:10.1016/j.omtm.2018.04.005 (2018).
- 44 37 Portela, A. & Digard, P. The influenza virus nucleoprotein: a multifunctional RNA-  
45 binding protein pivotal to virus replication. *J Gen Virol* **83**, 723-734,  
46 doi:10.1099/0022-1317-83-4-723 (2002).
- 47 38 Gabriel, G., Herwig, A. & Klenk, H. D. Interaction of polymerase subunit PB2 and NP  
48 with importin alpha1 is a determinant of host range of influenza A virus. *PLoS Pathog*  
49 **4**, e11, doi:10.1371/journal.ppat.0040011 (2008).
- 50 39 Hu, Y., Sneyd, H., Dekant, R. & Wang, J. Influenza A Virus Nucleoprotein: A Highly  
51 Conserved Multi-Functional Viral Protein as a Hot Antiviral Drug Target. *Curr Top*  
52 *Med Chem* **17**, 2271-2285, doi:10.2174/1568026617666170224122508 (2017).
- 53 40 Harly, C. *et al.* Key implication of CD277/butyrophilin-3 (BTN3A) in cellular stress  
54 sensing by a major human  $\gamma\delta$  T-cell subset. *Blood* **120**, 2269-2279,  
55 doi:10.1182/blood-2012-05-430470 (2012).

- 1 41 Arnett, H. A. & Viney, J. L. Immune modulation by butyrophilins. *Nature reviews.*  
2 *Immunology* **14**, 559-569, doi:10.1038/nri3715 (2014).
- 3 42 Gu, S., Borowska, M. T., Boughter, C. T. & Adams, E. J. Butyrophilin3A proteins and  
4 Vγ9Vδ2 T cell activation. *Semin Cell Dev Biol* **84**, 65-74,  
5 doi:10.1016/j.semcdb.2018.02.007 (2018).
- 6 43 Galão, R. P. *et al.* TRIM25 and ZAP target the Ebola virus ribonucleoprotein complex  
7 to mediate interferon-induced restriction. *PLoS Pathog* **18**, e1010530,  
8 doi:10.1371/journal.ppat.1010530 (2022).
- 9 44 Kuroda, M. *et al.* Identification of interferon-stimulated genes that attenuate Ebola  
10 virus infection. *Nature Communications* **11**, 2953, doi:10.1038/s41467-020-16768-7  
11 (2020).
- 12 45 Robinson, J. L. *et al.* Swine influenza (H3N2) infection in a child and possible  
13 community transmission, Canada. *Emerg Infect Dis* **13**, 1865-1870,  
14 doi:10.3201/eid1312.070615 (2007).
- 15 46 Subbarao, E. K., London, W. & Murphy, B. R. A single amino acid in the PB2 gene of  
16 influenza A virus is a determinant of host range. *J Virol* **67**, 1761-1764,  
17 doi:10.1128/jvi.67.4.1761-1764.1993 (1993).
- 18 47 Mehle, A. & Doudna, J. A. Adaptive strategies of the influenza virus polymerase for  
19 replication in humans. *Proc Natl Acad Sci U S A* **106**, 21312-21316,  
20 doi:10.1073/pnas.0911915106 (2009).
- 21 48 Philippon, D. A. M., Wu, P., Cowling, B. J. & Lau, E. H. Y. Avian Influenza Human  
22 Infections at the Human-Animal Interface. *J Infect Dis* **222**, 528-537,  
23 doi:10.1093/infdis/jiaa105 (2020).
- 24 49 Wang, D., Zhu, W., Yang, L. & Shu, Y. The Epidemiology, Virology, and  
25 Pathogenicity of Human Infections with Avian Influenza Viruses. *Cold Spring Harbor*  
26 *perspectives in medicine* **11**, doi:10.1101/cshperspect.a038620 (2021).
- 27 50 Adlhoch, C. *et al.* Avian influenza overview December 2021 - March 2022. *Efsa j* **20**,  
28 e07289, doi:10.2903/j.efsa.2022.7289 (2022).
- 29 51 Oliver, I. *et al.* A case of avian influenza A(H5N1) in England, January 2022. *Euro*  
30 *Surveill* **27**, doi:10.2807/1560-7917.Es.2022.27.5.2200061 (2022).
- 31 52 Ramirez, R. D. *et al.* Immortalization of human bronchial epithelial cells in the  
32 absence of viral oncoproteins. *Cancer Res* **64**, 9027-9034, doi:10.1158/0008-  
33 5472.Can-04-3703 (2004).
- 34 53 Wit, E. d. *et al.* Efficient generation and growth of influenza virus A/PR/8/34 from  
35 eight cDNA fragments. *Virus Research* **103**, 155-161,  
36 doi:<https://doi.org/10.1016/j.virusres.2004.02.028> (2004).
- 37 54 Rihn, S. J. *et al.* TRIM69 Inhibits Vesicular Stomatitis Indiana Virus. *J Virol* **93**,  
38 doi:10.1128/JVI.00951-19 (2019).
- 39 55 Rihn, S. J. *et al.* A plasmid DNA-launched SARS-CoV-2 reverse genetics system and  
40 coronavirus toolkit for COVID-19 research. *PLoS Biol* **19**, e3001091,  
41 doi:10.1371/journal.pbio.3001091 (2021).
- 42 56 Kawakami, E. *et al.* Strand-specific real-time RT-PCR for distinguishing influenza  
43 vRNA, cRNA, and mRNA. *J Virol Methods* **173**, 1-6,  
44 doi:10.1016/j.jviromet.2010.12.014 (2011).
- 45 57 Bakshi, S., Taylor, J., Strickson, S., McCartney, T. & Cohen, P. Identification of TBK1  
46 complexes required for the phosphorylation of IRF3 and the production of interferon  
47 β. *Biochem J* **474**, 1163-1174, doi:10.1042/bcj20160992 (2017).
- 48 58 Balazs, A. B. *et al.* Antibody-based protection against HIV infection by vectored  
49 immunoprophylaxis. *Nature* **481**, 81-84, doi:10.1038/nature10660 (2011).
- 50 59 Zufferey, R., Donello, J. E., Trono, D. & Hope, T. J. Woodchuck hepatitis virus  
51 posttranscriptional regulatory element enhances expression of transgenes delivered  
52 by retroviral vectors. *J Virol* **73**, 2886-2892, doi:10.1128/jvi.73.4.2886-2892.1999  
53 (1999).
- 54 60 Rghei, A. D. *et al.* Production of Adeno-Associated Virus Vectors in Cell Stacks for  
55 Preclinical Studies in Large Animal Models. *J Vis Exp*, doi:10.3791/62727 (2021).

1 61 MacLeod, M. K. *et al.* Vaccine adjuvants aluminum and monophosphoryl lipid A  
2 provide distinct signals to generate protective cytotoxic memory CD8 T cells. *Proc*  
3 *Natl Acad Sci U S A* **108**, 7914-7919, doi:10.1073/pnas.1104588108 (2011).  
4 62 Camacho, C. *et al.* BLAST+: architecture and applications. *BMC Bioinformatics* **10**,  
5 421, doi:10.1186/1471-2105-10-421 (2009).  
6 63 Cunningham, F. *et al.* Ensembl 2022. *Nucleic Acids Res* **50**, D988-d995,  
7 doi:10.1093/nar/gkab1049 (2022).  
8 64 Mistry, J., Finn, R. D., Eddy, S. R., Bateman, A. & Punta, M. Challenges in homology  
9 search: HMMER3 and convergent evolution of coiled-coil regions. *Nucleic Acids Res*  
10 **41**, e121, doi:10.1093/nar/gkt263 (2013).  
11 65 Katoh, K. & Standley, D. M. MAFFT multiple sequence alignment software version 7:  
12 improvements in performance and usability. *Mol Biol Evol* **30**, 772-780,  
13 doi:10.1093/molbev/mst010 (2013).  
14 66 Suyama, M., Torrents, D. & Bork, P. PAL2NAL: robust conversion of protein  
15 sequence alignments into the corresponding codon alignments. *Nucleic Acids Res* **34**,  
16 W609-612, doi:10.1093/nar/gkl315 (2006).  
17 67 Nguyen, L. T., Schmidt, H. A., von Haeseler, A. & Minh, B. Q. IQ-TREE: a fast and  
18 effective stochastic algorithm for estimating maximum-likelihood phylogenies. *Mol*  
19 *Biol Evol* **32**, 268-274, doi:10.1093/molbev/msu300 (2015).  
20 68 Steinegger, M. & Söding, J. MMseqs2 enables sensitive protein sequence searching  
21 for the analysis of massive data sets. *Nat Biotechnol* **35**, 1026-1028,  
22 doi:10.1038/nbt.3988 (2017).  
23 69 Sagulenko, P., Puller, V. & Neher, R. A. TreeTime: Maximum-likelihood  
24 phylodynamic analysis. *Virus Evol* **4**, vex042, doi:10.1093/ve/vex042 (2018).  
25 70 Hoang, D. T., Chernomor, O., von Haeseler, A., Minh, B. Q. & Vinh, L. S. UFBoot2:  
26 Improving the Ultrafast Bootstrap Approximation. *Mol Biol Evol* **35**, 518-522,  
27 doi:10.1093/molbev/msx281 (2018).  
28 71 Yu, G. Using ggtree to Visualize Data on Tree-Like Structures. *Curr Protoc*  
29 *Bioinformatics* **69**, e96, doi:10.1002/cpbi.96 (2020).  
30 72 Huerta-Cepas, J., Serra, F. & Bork, P. ETE 3: Reconstruction, Analysis, and  
31 Visualization of Phylogenomic Data. *Mol Biol Evol* **33**, 1635-1638,  
32 doi:10.1093/molbev/msw046 (2016).

33

34



# 1 **Figures and legends**

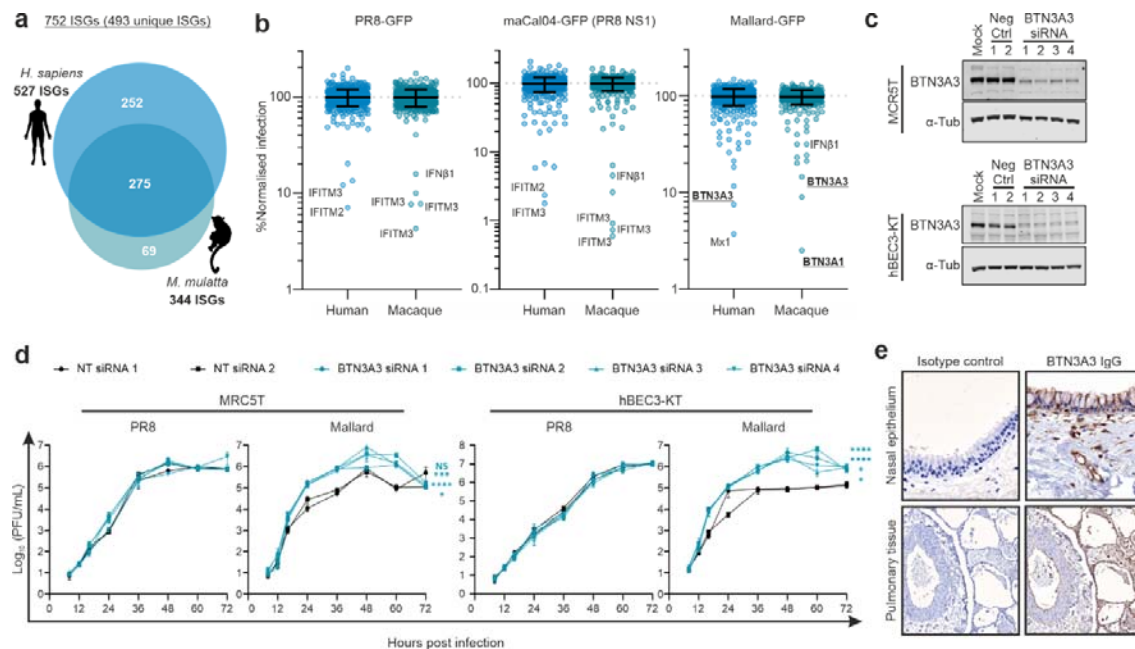

**Figure 1: Arrayed ISG libraries screens identify BTN proteins as restriction factors for avian IAV.** **a** Schematic representation of the ISG libraries used in the screens. **b**, Graphs showing the results of normalised infections (% median of overall library) of cells expressing individual ISGs with the indicated viruses. ISGs restricting virus replication are labelled. **c**, Western blotting showing expression and effective siRNA-driven knock-down of BTN3A3 in MRC5T and hBEC3-KT. Cells were transfected with scrambled (Neg ctrl) or BTN3A3-targeting siRNAs, and protein levels in the resulting cell lysates were assessed by western blotting. α-Tubulin was used as loading control. **d**, Replication kinetics of PR8 and Mallard in siRNA-treated MRC5T and hBEC3-KT. Cells were infected with a MOI of 0.001 and supernatants were collected at the mentioned times post-infection. Infectious viral titres were determined by plaque assay. Data are mean  $\pm$  standard error of the mean (SEM) of 3 independent experiments. Statistical significance between groups was measured by a 2-way ANOVA. Comparisons were made between area under the curve of the different BTN3A3 siRNA treatment conditions and the average of the two Neg ctrl. NS-Non-significant, \* $p \leq 0.05$ , \*\* $p \leq 0.01$ , \*\*\* $p \leq 0.001$ , \*\*\*\* $p \leq 0.0001$ . **e**, Micrographs of human nasal epithelium and lung sections subjected to immunohistochemistry. Cells expressing BTN3A3 (shown in brown) are found along the entire nasal epithelium and in endothelial cells, immune cells as well as pneumocytes.

1

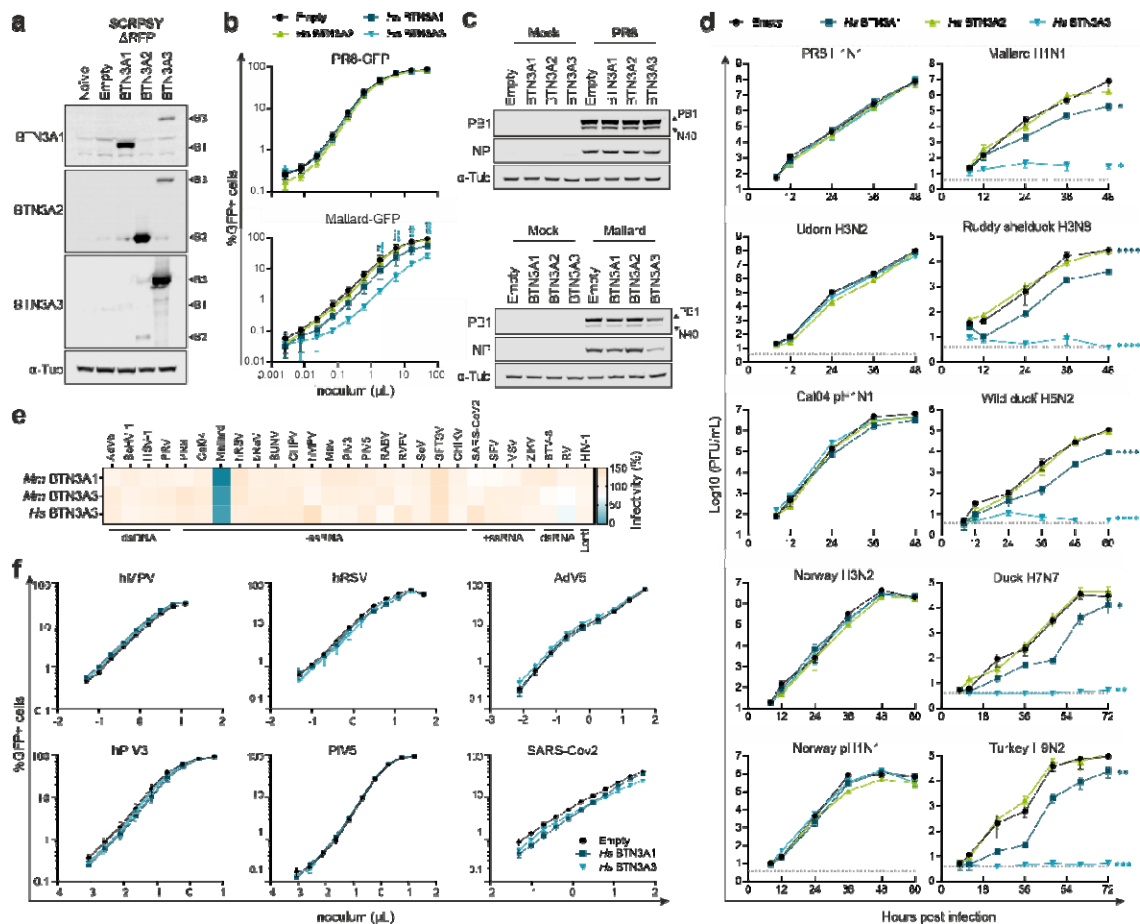

2

**Figure 2: BTN3A1 and BTN3A3 restrict replication of avian but not human IAV.** **a**, Western blotting of cell lysates obtained from A549 cells stably expressing human BTN3A1, BTN3A2 or BTN3A3. Due to their sequence and domain similarity, cross-detection of BTN3A3 was observed with the BTN3A1 and BTN3A2 antibodies, while BTN3A2 is detected also using anti-BTN3A3 antibodies. **b**, BTN-overexpressing cells were challenged with serial dilutions of GFP-tagged PR8 or Mallard for 10h. Upon trypsinisation and fixation, percentage of GFP-positive cells was measured by flow cytometry. Data are mean  $\pm$  SEM of 3 independent experiments. Statistical significance between groups was measured by a 1-way ANOVA for each virus dose. Comparisons were made between each BTN-expressing cells and empty control. \* $p \leq 0.05$ , \*\* $p \leq 0.01$ , \*\*\* $p \leq 0.001$ , \*\*\*\* $p \leq 0.0001$ . **c**, A549 cells as in (a) and (b) were infected with PR8 or Mallard WT viruses at a MOI 3 for 6h. Viral protein expression was measured by detection of PB1 (and PB1-N40) and NP by western blot. **d**, Replication kinetics of a panel of human (left panels) and avian (right panels) viruses in A549-Empty and BTN3A1 or BTN3A3-expressing cells. Cells were infected at an MOI of 0.001. Supernatants were collected at the indicated timepoints post-infection and infectious virus titres were obtained by plaque assay. A/Puerto Rico/8/1934 H1N1 (PR8 H1N1), A/Udm/307/1972 H3N2 (Udm H3N2), A/California/04/2009 H1N1 (Cal04 H1N1), A/Norway/2433/2018 H3N2 (Norway H3N2), A/Norway/3275/2018 H1N1 (Norway H1N1), A/mallard/Netherlands/10-Cam/1999 H1N1 (Mallard H1N1), A/ruddy shelduck/Mongolia/963V/2009 H3N8 (Ruddy shelduck H3N8), A/wild-duck/Italy/17VIR6926-1/2017 H5N2 (Wild duck H5N2), A/duck/Italy/18VIR4932-2/2018 H7N7 (Duck H7N7), A/turkey/Italy/16VIR8643-54/2016 H9N2 (Turkey H9N2). Data represent mean  $\pm$  SEM of 3 independent experiments. Statistical significance between groups was measured by a 2-way ANOVA. Comparisons were made between area under the curve of the different BTN-expressing cells and empty control. \* $p \leq 0.05$ , \*\* $p \leq 0.01$ , \*\*\* $p \leq 0.001$ , \*\*\*\* $p \leq 0.0001$ . **e**, Heatmap showing ISG screens (similar to Fig. 1b) and normalised infection of cells expressing BTN3A1 and BTN3A3 for a panel of viruses.



1 Details can be found in Materials and Methods. f, Human BTN3A1 and BTN3A3 overexpressing  
2 A549s were challenged with different volumes of the GFP-tagged viruses indicated in the figure. Cells  
3 were fixed at 10 hours for PR8 and Mallard and 16 hours post infection for the remaining viruses.  
4 Percentage of GFP-positive cells was measured by flow cytometry. Data are mean +/- SEM of 3  
5 independent experiments. Statistical significance between groups was measured by a 1-way ANOVA  
6 for each virus dose. Comparisons were made between each BTN-expressing cells and empty control  
7 and no significant differences were found.

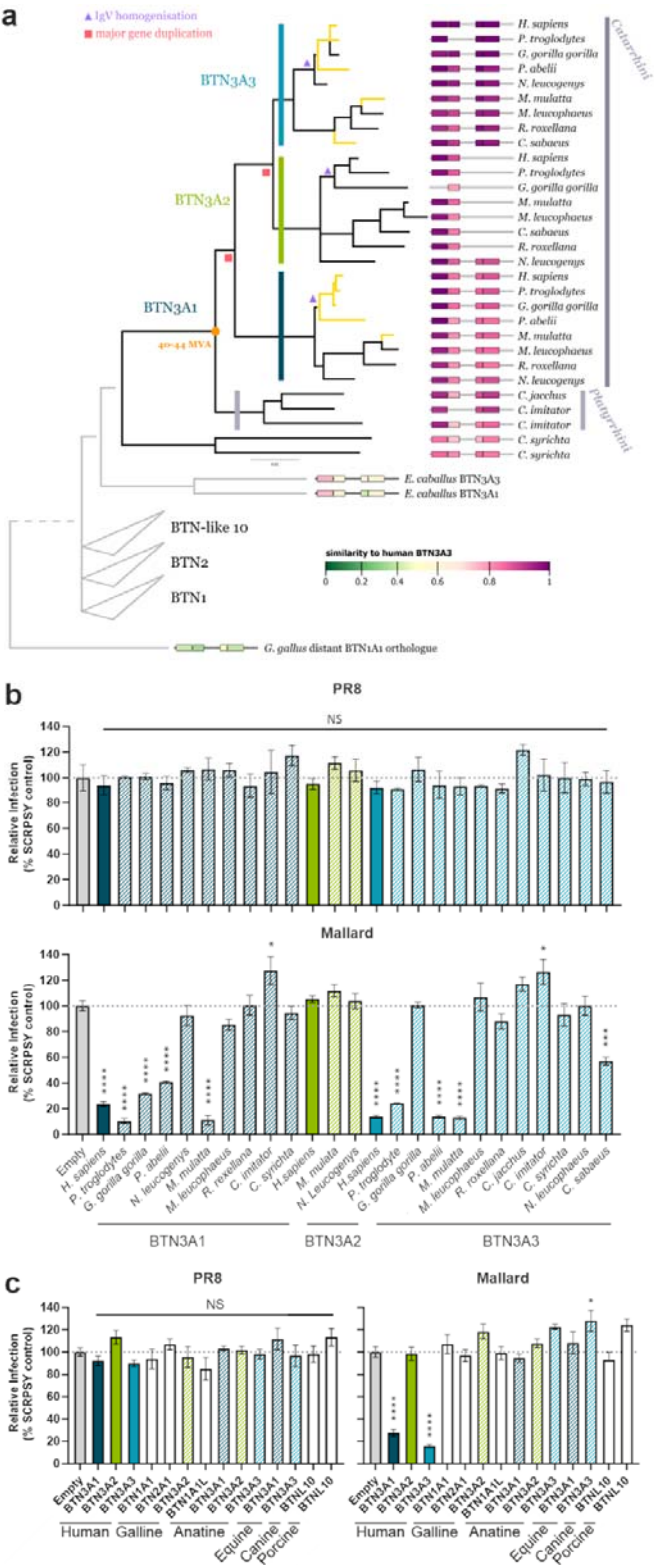

**Figure 3: Evolution of antiviral activity of BTNs.**

**a**, Maximum likelihood phylogeny of concatenated protein domain coding sequences the Haplorrhini BTN3 genes (K2P+G4 substitution model). Nodes with bootstrap support below 60 have been collapsed. Branches confirmed to have anti-avian IAV activity (see below) are highlighted in yellow. Relation to more distant tested homologues and orthologous/paralogous gene families are shown as a schematic in grey. IgV homogenisation events, major gene duplications and gene subfamilies are annotated on the phylogeny. Presence of each of the four protein domains (IgV, IgC, PRY and SPRY) is annotated on the right of each tree tip and coloured by pairwise amino acid similarity to the respective domain of the human BTN3A3. Species names and taxonomic classification is annotated on the right. The median divergence time between *Catarrhini* and *Platyrrhini* was retrieved from timetree. **b-c**, A549 cells were transiently transduced with SCRPSY lentiviruses expressing the indicated BTN proteins and challenged with PR8- or Mallard-GFP. 8 h post infection, the percentage of GFP-positive cells was measured by flow cytometry. Data are mean  $\pm$  SEM of 2 independent experiments. Statistical significance between groups was measured by a 1-way ANOVA. Comparisons were made between each BTN-expressing cells and empty control. NS-Non-significant, \* $p \leq 0.05$ , \*\* $p \leq 0.01$ , \*\*\* $p \leq 0.001$ , \*\*\*\* $p \leq 0.0001$ .

1

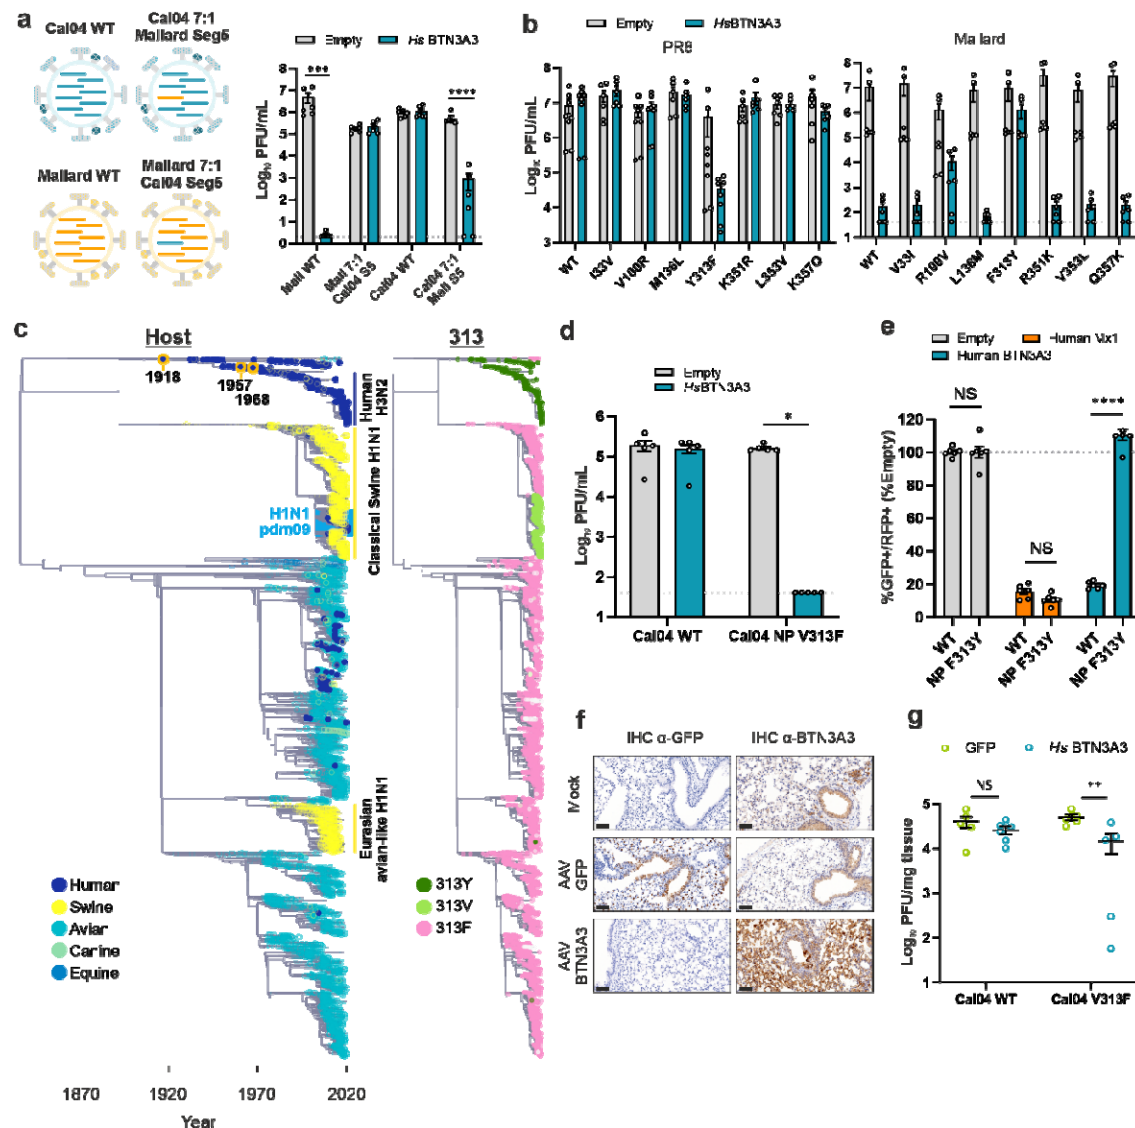

2

**Figure 4: NP amino acid residue 313 determines sensitivity or resistance to BTN3A3.** **a**, A549-Empty and BTN3A3 expressing cells were infected with the four viruses represented in the schematic at an MOI of 0.001 for 48 h, after which infectious virus titres were quantified by plaque assays. Data are mean  $\pm$  SEM of 3 independent experiments. Dots represent individual technical replicates. Statistical significance between groups was measured by multiple t-tests and corrected for multiple comparisons using the Holm-Sidak method. NS-Non-significant, \* $p \leq 0.05$ , \*\* $p \leq 0.01$ , \*\*\* $p \leq 0.001$ , \*\*\*\* $p \leq 0.0001$ . **b**, PR8 and Mallard NP single mutants were used to infect A549-Empty and A549-BTN3A3 and infectious titres were assessed by plaque assays as in (a). **c**, Tip-dated maximum likelihood phylogeny of the filtered IAV NP coding sequence dataset (see Methods). Tip shapes are annotated by host (left) and 313 residue (right, only residues occurring in more than 5% of the sequences are shown in the legend). Key clades and pandemic isolates are highlighted on the phylogeny. **d**, Cal04 and point mutant Cal04 V313F were used to infect A549-Empty and A549-BTN3A3 at a MOI of 0.001 for 48 hours, after which infectious virus titres were quantified by plaque assays and in (a). Data are mean  $\pm$  SEM of 2 technical replicates from 3 independent experiments. Statistical differences between Empty and HsBTN3A3 were calculated using multiple t-tests and corrected for multiple comparisons using the Holm-Sidak method. NS-Non-significant, \* $p \leq 0.05$ . **e**, A549 overexpressing human Mx1 and BTN3A3 from SCRPSY lentiviral vectors were infected with GFP-tagged Mallard WT and NP F313Y mutant. 10 h post-infection cells were trypsinised, fixed and

20

1 RFP-and GFP-positive cells were measured by FACS. Data are mean +/- SEM of 2 technical  
2 replicates from 2 independent experiments. Statistical differences between Empty and *HsBTN3A3*  
3 were calculated using multiple t-tests and corrected for multiple comparisons using the Holm-Šidák  
4 method. NS-Non-significant, \*\*\*\* $p \leq 0.0001$ . f, Lungs from C57BL/6 mice instilled with PBS (mock) or  
5 AAV vectors containing either GFP or *BTN3A3* were examined for expression of GFP or *BTN3A3*  
6 after 3 weeks. Immunohistochemistry of mock-transduced-mice and AAV-GFP mice showed a weak  
7 *BTN3A3* staining (light brown) in the bronchial epithelium, while AAV-*HsBTN3A3* overexpressing mice  
8 show a strong signal in pneumocytes, vessels and immune cells (dark brown). Bars represent 70 $\mu$ m.  
9 g, Mice were infected with either WT Cal04 (6:2 PR8 HANA) or Cal04-V313F (6:2 PR8 HANA) 3  
10 weeks post-AAV treatment. Viral titres were assessed 3 days post infection. Data represent mean +/-  
11 SEM. Dots represent individual mice. Statistical differences between AAV-GFP and AAV-*BTN3A3*  
12 were calculated using multiple t-tests and corrected for multiple comparisons using the Holm-Šidák  
13 method. NS-Non-significant, \*\* $p \leq 0.01$ .

14

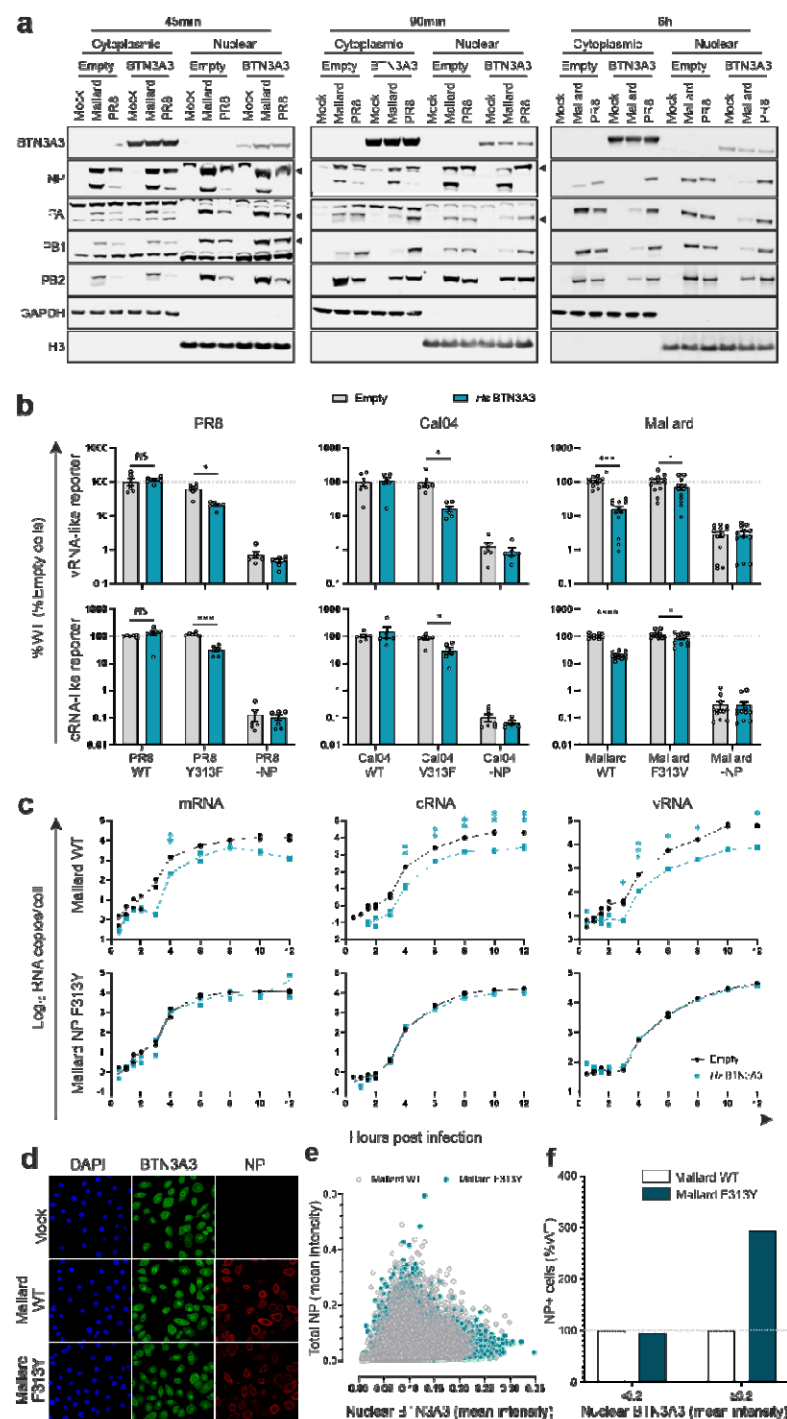

1

2 **Figure 5: BTN3A3 blocks vRNA transcription.** **a**, A549-Empty and A549-BTN3A3 cells were  
3 infected with PR8 and Mallard WT at an MOI 3 and cells were lysed at the indicated times post-  
4 infection. Nuclear/cytoplasmic fractionation was performed and viral RNP components were detected  
5 in either fraction by western blotting. GAPDH and Histone H3 were used as cytoplasmic and nuclear  
6 marker, respectively. Given the different times post infection and the different amounts of  
7 accumulated viral proteins between them, the three presented data sets originated from different  
8 volumes of lysate and different exposure times. **b**, A549-Empty and A549-BTN3A3 cells were  
9 transfected with pDUAL plasmids encoding for PB2, PB1, PA and NP of the indicated viruses  
10 alongside firefly luciferase-coding vRNA- or cRNA-like reporter plasmids. 48 h post transduction, cells

1 were lysed and firefly luciferase was measured. Values were normalised to WT NP-coding RNPs  
2 transfected in A549-Empty. Data are mean  $\pm$  SEM of 2 technical replicates from 3 independent  
3 experiments. Statistical differences between Empty and *HsBTN3A3* were calculated using multiple t-  
4 tests and corrected for multiple comparisons using the Holm-Šídák method. NS= non-significant,  
5 \* $p \leq 0.05$ , \*\* $p \leq 0.01$ , \*\*\* $p \leq 0.001$ , \*\*\*\* $p \leq 0.0001$ . **c**, A549-Empty and A549-BTN3A3 cells were infected at  
6 MOI 3 and cells were lysed at the indicated times post infection. Total RNA was extracted, and  
7 different viral RNA species were quantified by a 2-step RT-qPCR. Data are mean  $\pm$  SEM of 3  
8 independent experiments. Statistical differences between Empty and *HsBTN3A3* for each time point  
9 were calculated using multiple t-tests and corrected for multiple comparisons using the Holm-Šídák  
10 method. \* $p \leq 0.05$ , \*\* $p \leq 0.01$ , \*\*\* $p \leq 0.001$ . **d**, Representative image of confocal microscopy of hBEC3-KT  
11 cells infected with Mallard WT or Mallard NP F313Y at MOI 3. 6 hours post infection, cells were  
12 immunostained with NP (red) and BTN3A3 (green). DAPI staining was used as nuclear marker.  
13 Image acquisition was performed with a Zeiss 880 confocal microscope using a 63x objective. **e**,  
14 Images from >3500 cells from four independent experiments performed as in d were used to quantify  
15 total NP and nuclear BTN3A3 for Mallard WT and Mallard NP F313Y. **f**, Values from b were stratified  
16 based on nuclear BTN3A3 intensity ( $<0.2$  or  $\geq 0.2$ ). Data represents relative abundance of total  
17 infected cells present in each of the two nuclear BTN3A3 intensities ranges, taking values obtained  
18 with Mallard WT as 100%.

19



1

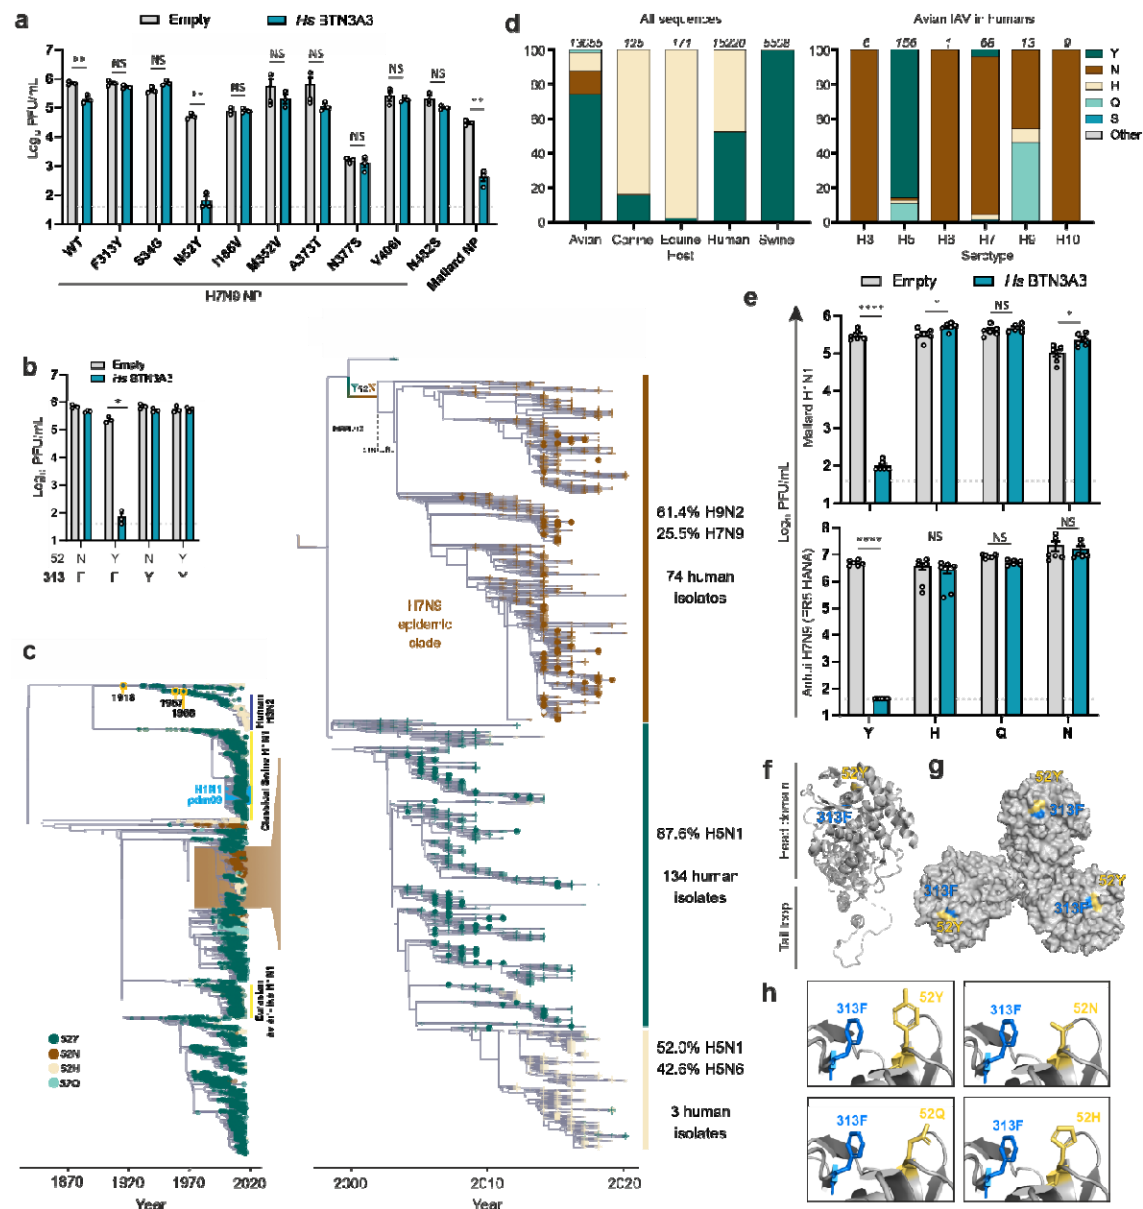

2

**Figure 6: Evasion of BTN3A3 correlates with avian-to-human spillovers.** **a-b**, Replication of H7N9:2 PR8 HA/NA reassortant viruses with the indicated NP mutations in A549-empty or A549-BTN3A3 expressing cells. Cells were infected at an MOI of 0.001 for 48h and titres were measured by plaque assay. Evasion of BTN3A3 restriction maps to amino acid residue 52 (a) but it is dependent on residue 313F (b). Data are mean  $\pm$  SEM of 3 independent experiments. Data are mean  $\pm$  SEM of a single technical replicate from 3 independent experiments. Statistical differences between values obtained in empty and BTN3A3 expressing cells were calculated using multiple t-tests and corrected for multiple comparisons using the Holm-Šidák method. NS =non-significant, \* $p \leq 0.05$ , \*\* $p \leq 0.01$ , \*\*\* $p \leq 0.001$ , \*\*\*\* $p \leq 0.0001$ . **c**, Tip-dated maximum likelihood phylogenies of the filtered IAV NP coding sequence dataset (left) and of all sequences clustering within the highlighted highlighted avian IAV clade (right). Tip shapes are coloured by site 52 residues (only residues present in more than 1% of the sequences are shown in the legend). Right: human isolates are annotated with circles and non-human isolates with transparent crosses to highlight human transmission. The branch where the Y52N change took place is annotated on the tree. Statistics of serotypes (present in more than 10% of the sequences in each subclade) and the number of human isolates are shown on the right of each

17



1 subclade. **d**, identity of amino acid residue in position 52 of all NP proteins available in the NCBI flu  
2 dataset used in this study (see Methods) (left) and in those collected from spillovers of avian IAV in  
3 humans (right). Sequences were separated into hosts and virus subtypes and occurrence of different  
4 52 residues was measured. Numbers over the bars equate to the number of sequences available for  
5 that particular host/subtype. **e**. Infectious virus titres obtained in A549-Empty and BTN3A3 expressing  
6 cells with NP 52 mutants of either Mallard or H7N7 6:2 PR8. Cells were infected at an MOI of 0.001  
7 for 48h. Infectious virus titres were acquired by plaque assay. Data are mean +/- SEM of 2 technical  
8 replicates from 3 independent experiments. Statistical differences between Empty and BTN3A3  
9 expressing cells were calculated using multiple t-tests and corrected for multiple comparisons using  
10 the Holm-Sidak method. NS= non-significant, \* $p \leq 0.05$ , \*\* $p \leq 0.01$ , \*\*\* $p \leq 0.001$ , \*\*\*\* $p \leq 0.0001$ . **e**, Ribbon  
11 structure of the monomer form of NP with amino acid residues changes mapped in colour. Using  
12 Pymol software and the 3.2Å crystal structure (Protein Data Base ID 2IQH); NP positions 52 and 313  
13 are highlighted in yellow and blue, respectively. **g**, Surface structure of trimeric NP with 52 and 313  
14 residues visibly mapped. **h**, Location and side chains of 313F and different 52 mutations were  
15 modelled using Pymol. Four focused panels are 52Y, 52N, 52D and 52Q.

16

17

18

19

1

2

3

4
